# Supplementary material
Source: PubMed Central journal article supplement (PMC7802636)
Supplement: NIHMS1003213-supplement-Supplementary_Figures_and_Tables.pdf [file NIHMS1003213-supplement-Supplementary_Figures_and_Tables.pdf]

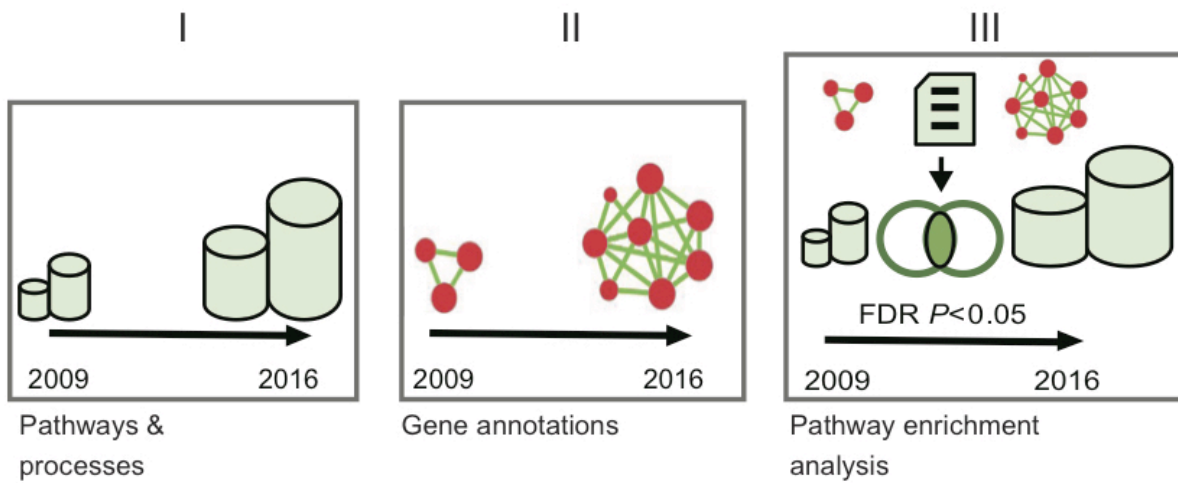

### Supplementary Figure 1

#### Analysis outline.

We analyzed the accumulation of knowledge of gene function during the period 2009-2016 and its impact on practical analysis of gene lists. Our analysis involved three major steps (I-III). First, we studied the evolution of vocabulary of biological processes and pathways from Gene Ontology and the Reactome database (panel I). Second, we studied how gene annotations to these pathways and processes have changed over time (panel II). Third, we evaluated the practical impact of knowledge accumulation by performing pathway enrichment analysis using current and out-dated functional resources on gene lists derived from recent cancer genomics studies (panel III).

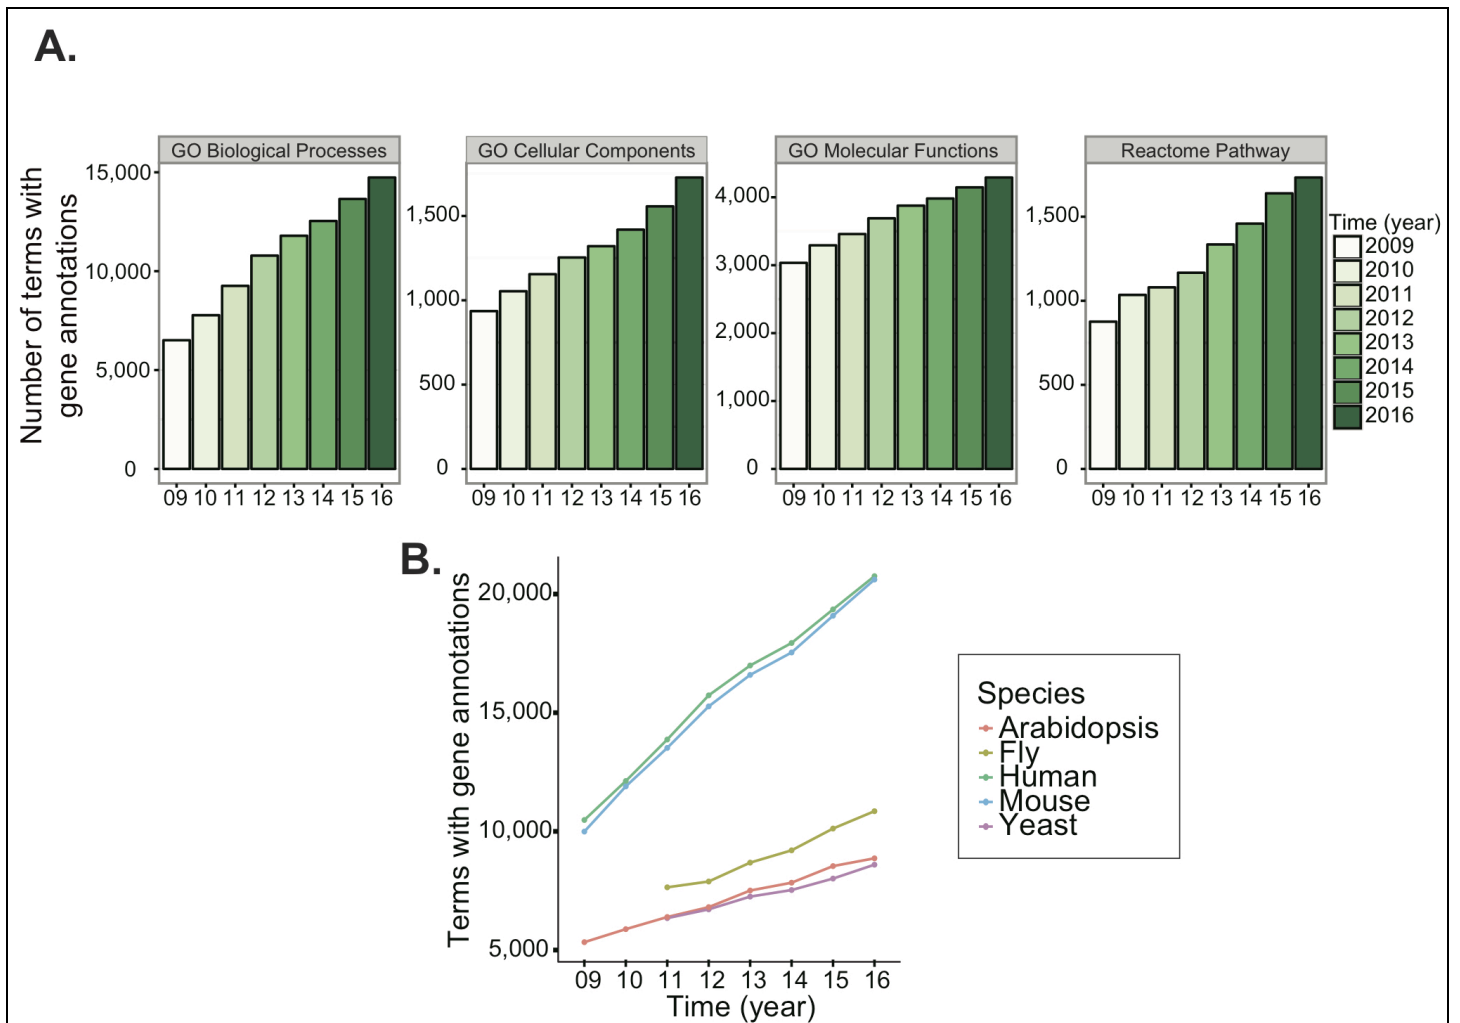

**Supplementary Figure 2**

The vocabulary of biological pathways and processes is growing rapidly.

(A) The number of human biological processes and molecular pathways has doubled during 2009-2016. Similar trends are apparent among human cell components and molecular functions. We counted the number of GO terms and Reactome pathways with at least one annotated human gene. (B) The numbers of annotated GO terms have also grown rapidly for model organisms.

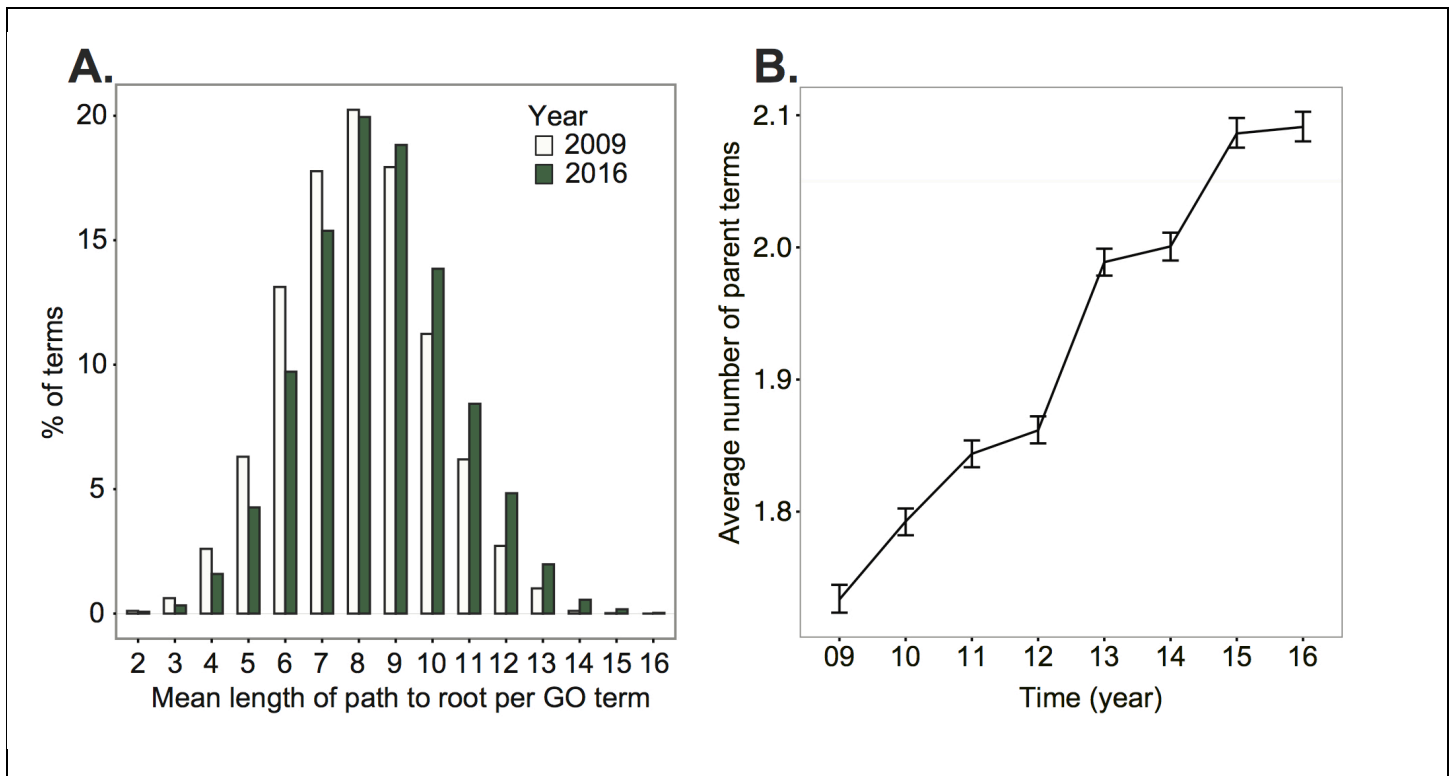

**Supplementary Figure 3**

Gene Ontology terms are increasingly specific and interconnected.

(A) Histogram shows mean length of paths in the Gene Ontology connecting a given term and the root term. Significant increase in the depth of the GO hierarchy between 2009 and 2016 ( $P < 10^{-5}$ , permutation test) indicates that the biological vocabulary is increasingly detailed and terms are becoming more specific. (B) The average number of parents per GO term has increased over time (2009-2016, 1.73 to 2.09;  $P < 10^{-5}$ ). We used a permutation test ( $n = 100,000$ ) to compute p-value to evaluate difference of earlier and recent values. Error bars represent 95% confidence intervals from resampling.

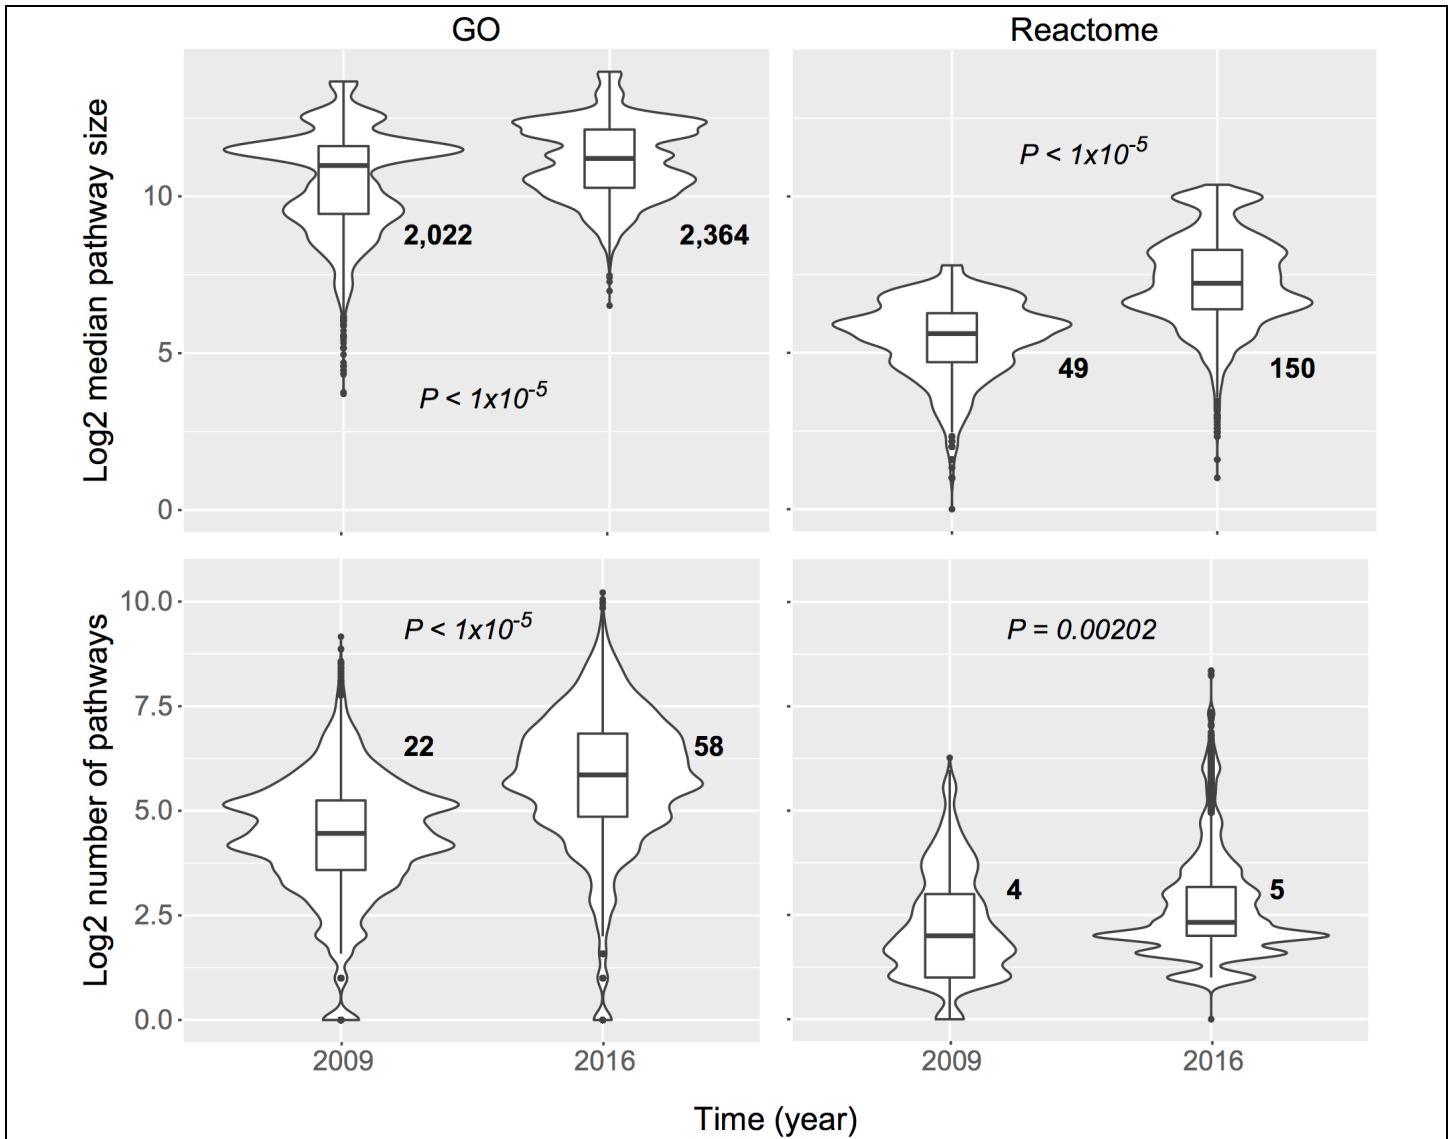

**Supplementary Figure 4**

Human genes and pathways are increasingly annotated.

Violin plots show the comparison of pathway size and gene annotation frequency in 2009 and 2016. In the top panels, the median pathway size (total number of genes in pathway) is shown for every gene on log2 scale. In the bottom panels, number of pathways annotated per every gene is shown on log2 scale. P-values were computed using permutation tests (n=100,000). Genes without annotations were excluded. GO biological processes (left) and Reactome pathways (right) are shown separately. The median number of each plot is shown in boldface letters.

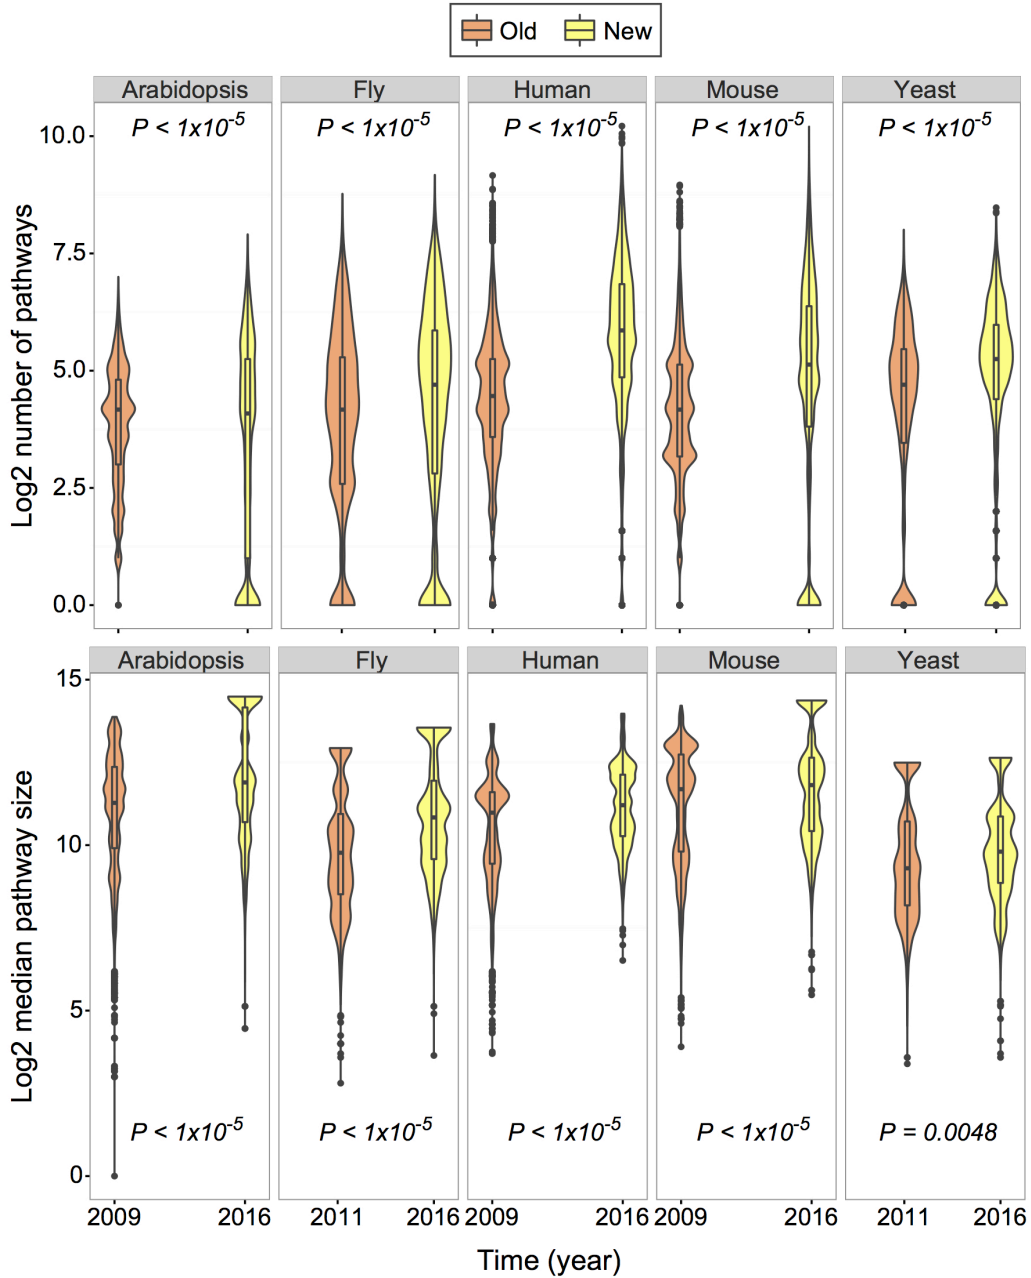

**Supplementary Figure 5**

Genes and pathways of model organisms are increasingly annotated.

Violin plots show the comparison of pathway size and gene annotation frequency in 2009 and 2016 for human and several model organisms. P-values were computed using permutation tests ( $n = 100,000$ ). Genes without annotations are excluded.

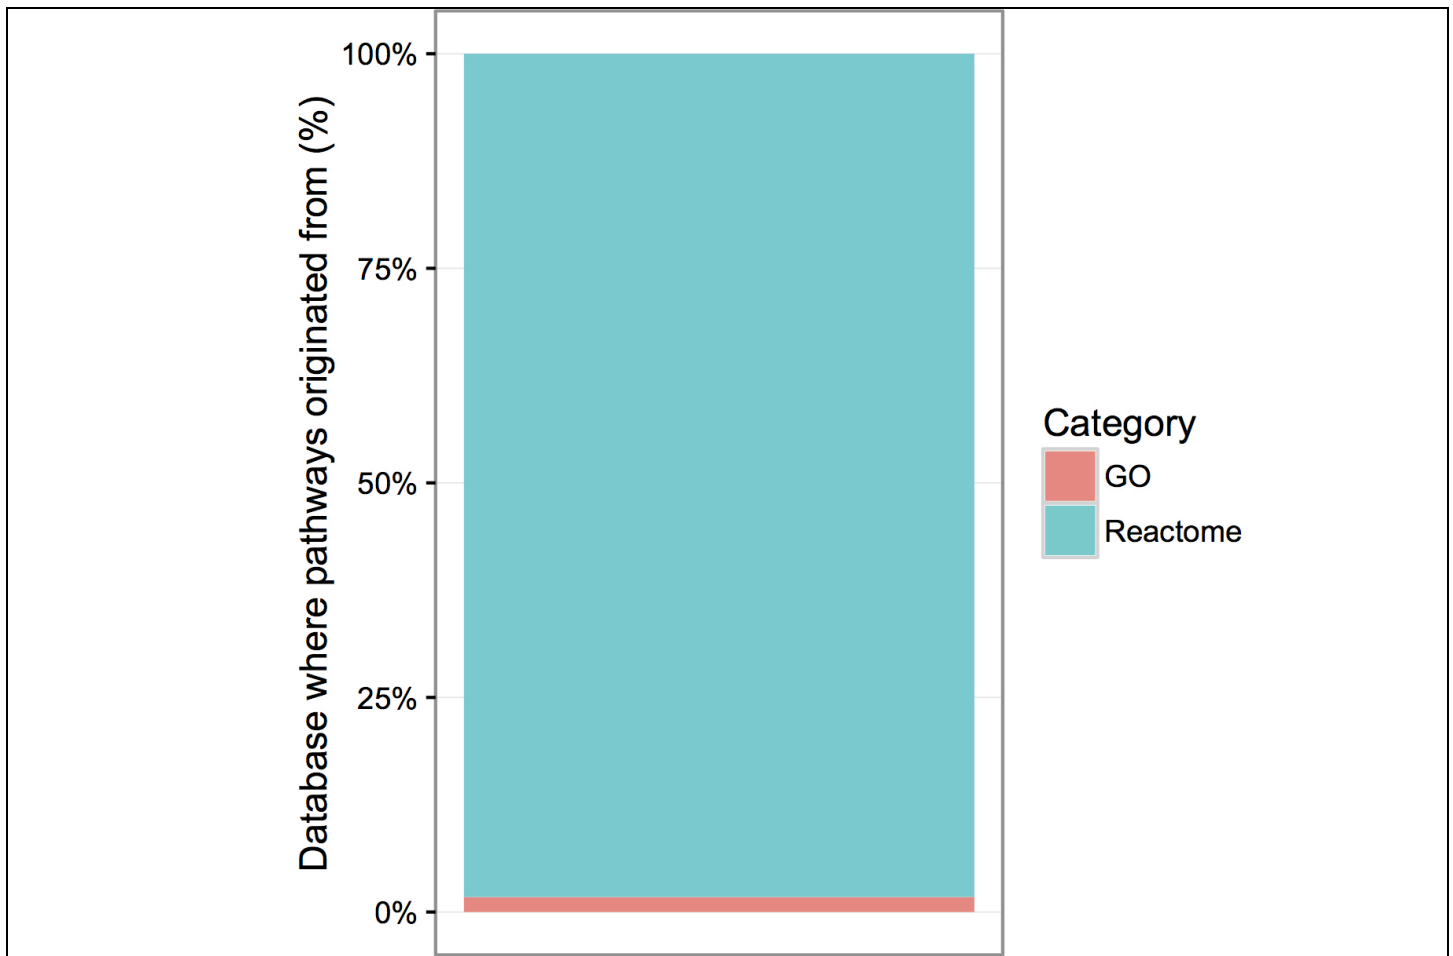

**Supplementary Figure 6**

Contemporary gene annotations include a prominent class of small and specific pathways from the manually curated Reactome resource.

Two-dimensional density plots of median pathway size per gene and numbers of pathway annotations per gene (Fig. 1b) reveal a bimodal distribution of pathways in current annotations from 2016. The group of pathways in the bottom left quadrant of the left panel of Figure 1b primarily represents gene annotations of the Reactome resource (98%). The corresponding genes have relatively few annotations to pathways (below median value) and the pathways themselves contain relatively few genes (also below median value). The group of Reactome pathways is not apparent among annotations of 2009.

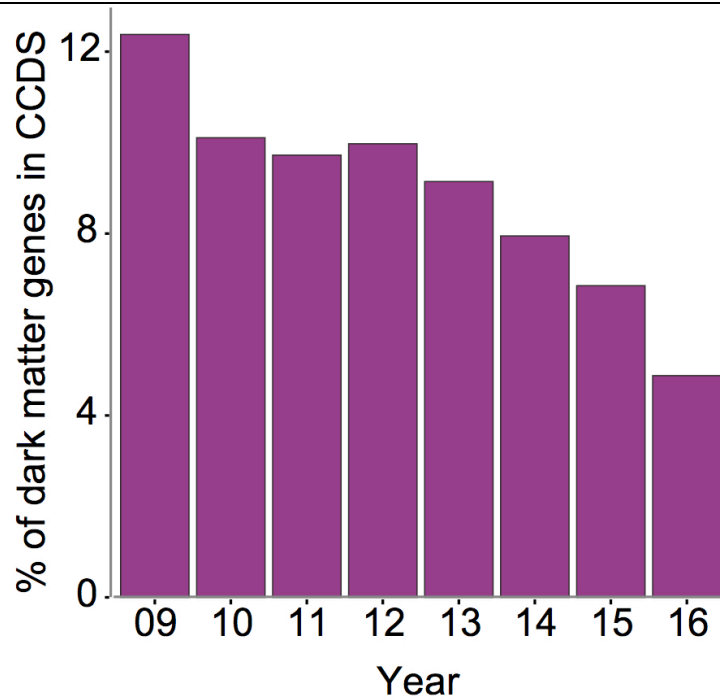

#### Supplementary Figure 7

The fraction of unannotated genes is decreasing consistently.

In 2009, one of eight high-confidence protein-coding genes (12.4%) from the CCDS database had no annotations in Gene Ontology or Reactome while this “dark matter” has decreased to 4.9% in 2016. Dark-matter genes included those with no annotations and also genes that only had root-level annotations in GO. We used the closest earlier release of the CCDS database to count annotated genes (e.g., the 2015 release of CCDS for 2016 annotations of GO, as CCDS of 2016 had not been released at the time of the analysis).

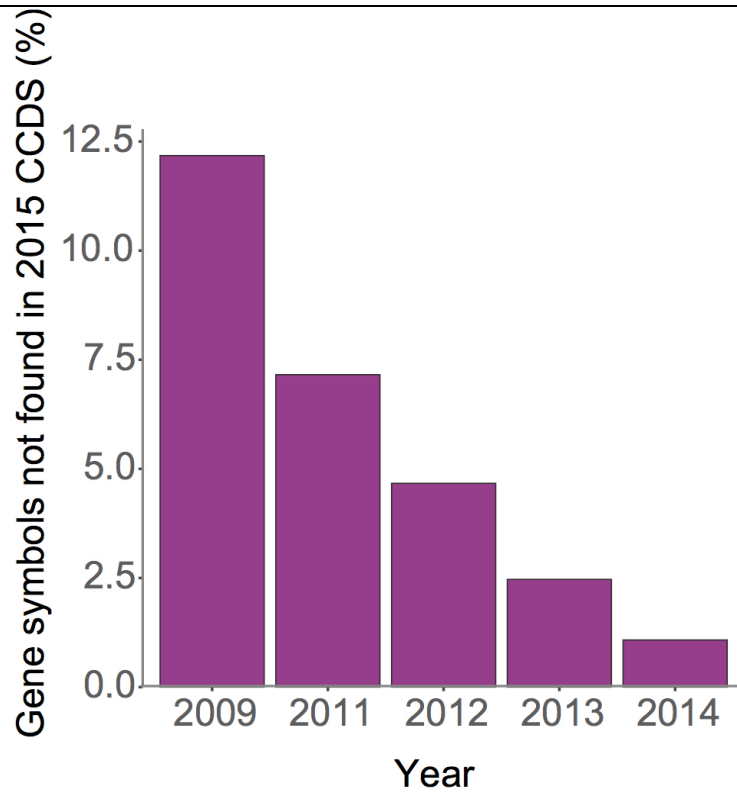

**Supplementary Figure 8**

Changes in gene nomenclature affect functional annotations.

Analysis of human gene lists from current datasets will cause mismatches of gene symbols as standard nomenclature has been updated over the years. We compared the HGNC symbols in the latest CCDS database (2015) to earlier database versions and counted the number of unmatched symbols.



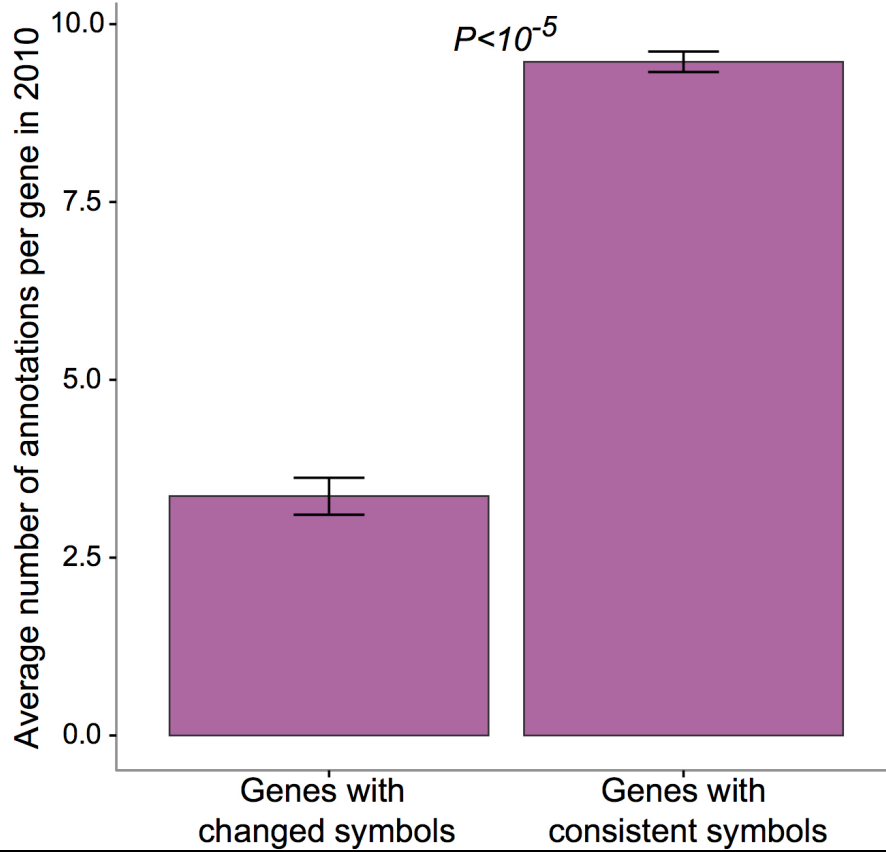

**Supplementary Figure 9**

Renamed genes have significantly fewer annotations.

We investigated the number of annotations for genes whose symbols differed in 2010 and 2016 and found that genes with changed symbols have significantly fewer annotations in 2010 than consistently named genes (average number of annotations per gene 3.1 vs 9.3, permutation test of  $n=100,000$ ,  $p < 10^{-5}$ ). Error bars represent 95% confidence intervals from resampling.

**A.**

GO &amp; Reactome: 2010 vs 2016

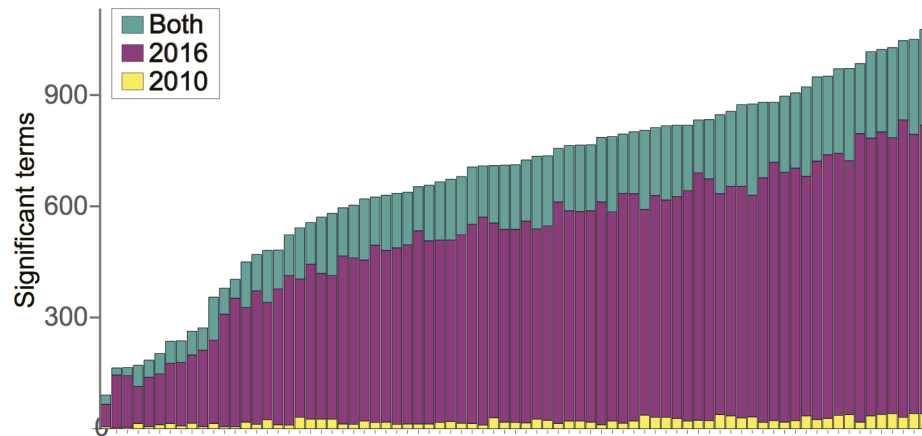**B.**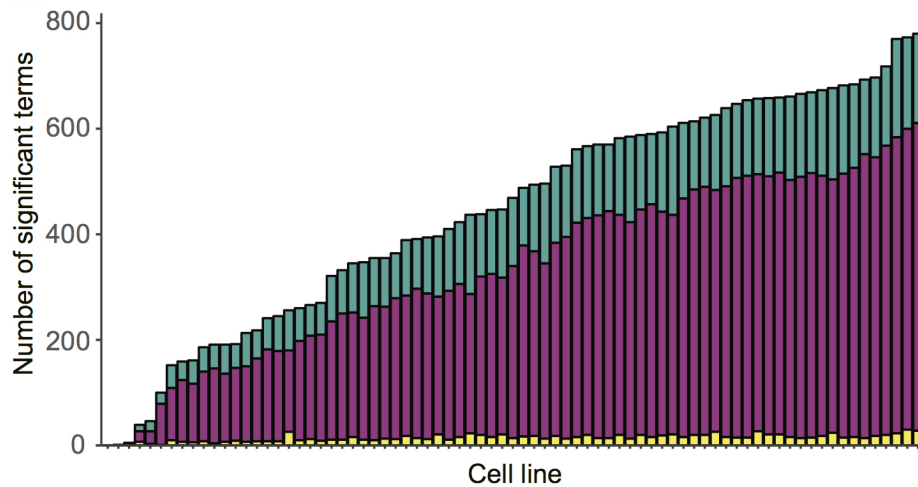**Supplementary Figure 10**

Pathway enrichment analysis of essential genes of breast cancer confirms loss of information in outdated annotations.

(A) We analysed top-500 essential genes from each of 77 cancer cell lines derived from recent shRNA screens. We studied (i) annotations from 2010 and (ii) annotations from 2016, and quantified enrichments using Fisher's exact test and multiple testing correction (FDR  $P < 0.05$ ). We then compared the resulting enriched terms from both analyses. We found a three-fold increase in detected pathways and processes when data were analyzed with current annotations from 2016 (695 pathways and processes per median cell line) compared to outdated annotations from 2010 (191 per median cell line, 74% missed when accounting for terms only appearing in 2010 annotations). GO biological processes and Reactome pathways were analyzed and respective counts are aggregated in the plot. (B) We repeated our pathway enrichment analysis of breast cancer essential genes by analyzing top-100 essential genes of the same dataset and found a similar difference of the effect of outdated and current pathway annotations (143 v 455 pathways, 71% missed in earlier annotations).

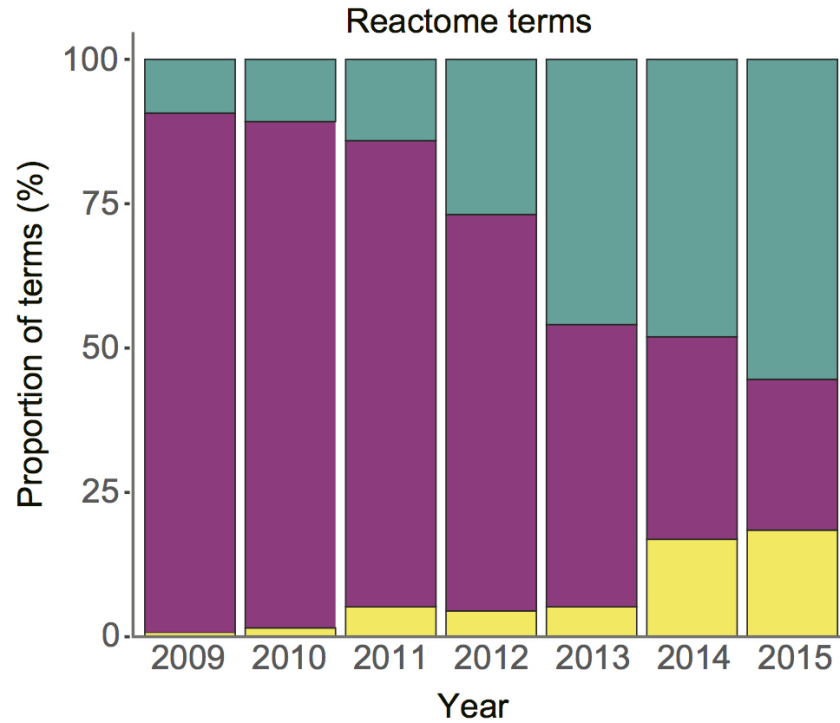

**Supplementary Figure 11**

Evolution of pathway information affects recently updated and out-of-date software tools.

We analyzed significantly mutated driver genes of glioblastoma using gene annotations of 2009-2016 and compared the results of 2016-era analysis with results of each earlier year. Colors indicate the fraction of commonly detected (yellow), 2016-only (purple) and outdated-only (dark blue) pathways from the Reactome resource with statistically significant enrichment (FDR  $p < 0.05$ ).

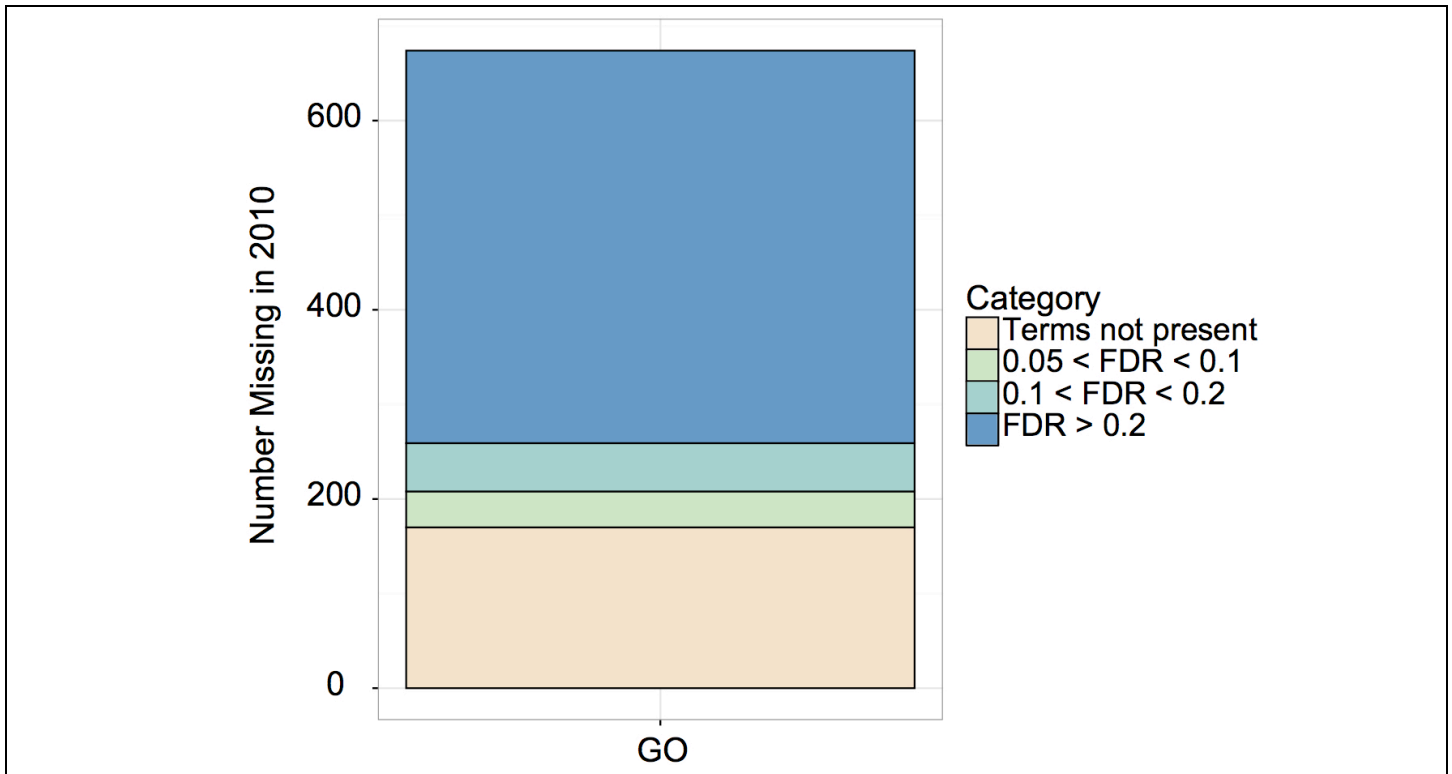

**Supplementary Figure 12**

Most missed GO terms in 2010-era analysis involve known pathways and processes that do not associate significantly with input genes.

We compared results of pathway enrichment analyses that used annotations from 2010 and 2016. The majority of pathways missed in the outdated annotations (~75%) exist in the 2010 edition of Gene Ontology, however these are not significantly associated to input genes. The remaining 25% represent processes added to GO after 2010.

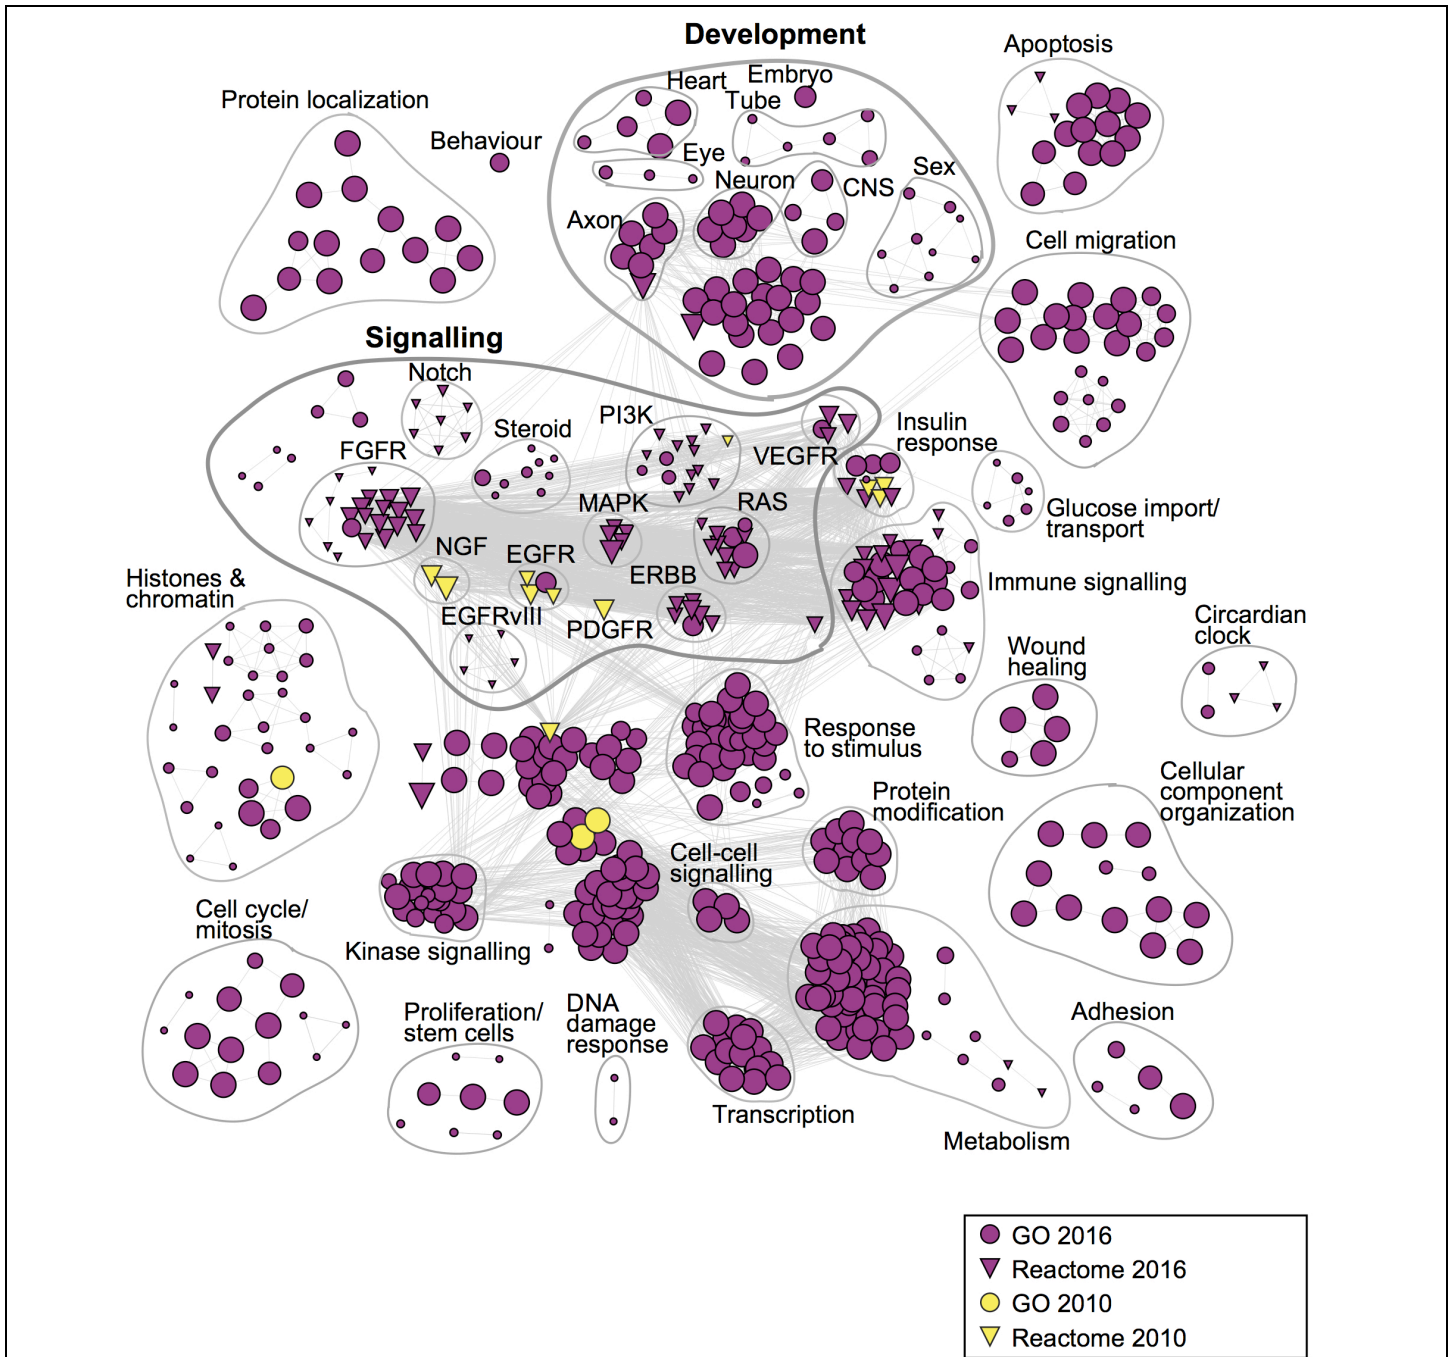

**Supplementary Figure 13**

Most pathway enrichments from outdated annotations from 2010 are based on low-quality information.

We repeated the pathway analysis of frequently mutated glioblastoma genes by only analyzing high-quality gene annotations from 2010 and 2016 (IEA annotations from GO were excluded). We found that 96.5% of results from 2016 analysis were missed when 2010 annotations were used, showing that earlier annotations are largely based on low-confidence information.

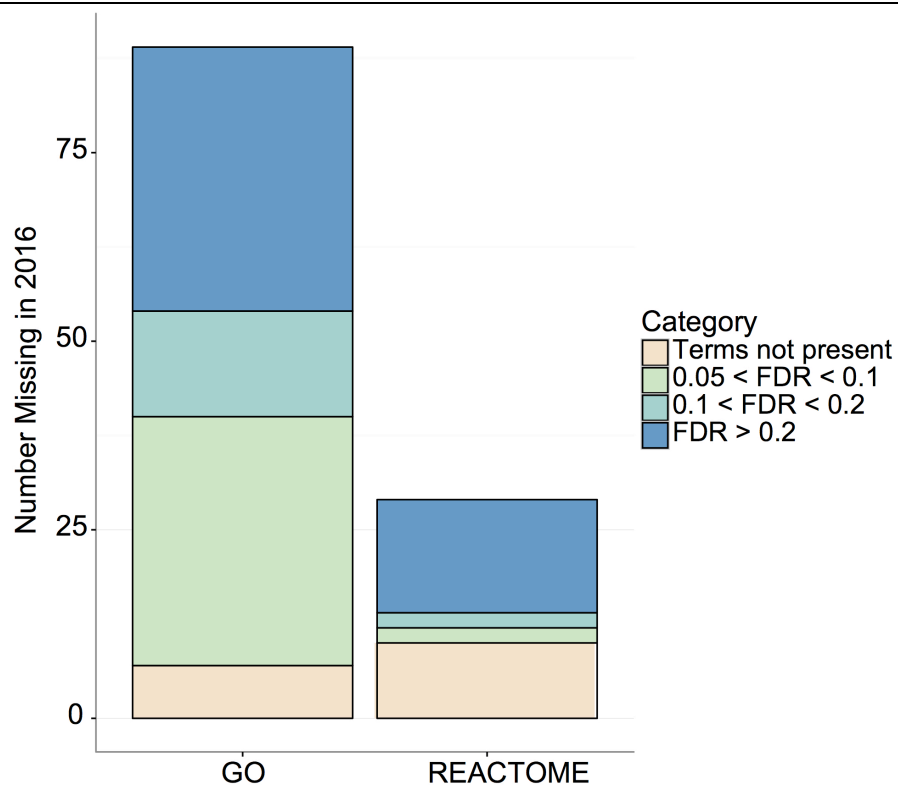

**Supplementary Figure 14**

Some enriched pathways and processes are missed in relatively recent gene annotations.

We compared results of pathway enrichment analyses that used annotations from 2015 and 2016. We focused on the terms that were found in the earlier analysis and missed in the most current annotations, including 89/743 (12%) GO terms and 29/116 (25%) Reactome pathways. The majority of missing pathways were part of the pathway database or GO in the up-to-date analysis although not detected at statistically significant levels (blue tones), while a smaller fraction of terms were entirely missing from the analysis, likely because of restructuring of pathways and processes.

## Supplementary Methods

**Collection of pathway tools and citations.** We collected web-based pathway enrichment analysis tools that included human gene annotations using literature search and recent review papers (refs 1,2,3). Tools were compared only in the context of gene annotation datasets and not their analytic capacity. The times of the most recent data updates were collected from the websites of selected tools. Developers were contacted if this information was unavailable. We collected primary publications of software and methods from the websites and used Google Scholar to find additional publications. We conducted a PubMed query for each selected publication, determined its PubMed ID and counted its citations in 2015 by defining a custom time range on publication date (01.01.2015-31.12.2015). Citations were summed across multiple publications for the same software tools.

**Ontologies and pathways.** Functional terminology of biological processes, molecular functions, and cell components was retrieved from the Gene Ontology<sup>4</sup> website (<http://geneontology.org/page/download-ontology>) and comprised January releases of each year (2009-2016; **Supplementary Table 3**). February release of GO was used for 2012 as the January release was unavailable. Five relationship types were considered (is\_a, part\_of, regulates, positively\_regulates, negatively\_regulates). Gene annotations were derived from the Gene Ontology Annotation database<sup>5</sup> (UniProt-GOA, <http://www.ebi.ac.uk/GOA/archive>). We selected GOA datasets that were released shortly after the corresponding GO ontologies. Genes were annotated to GO terms as well as parent and ancestor terms via all possible paths. Obsolete terms and negative relationships in GO were removed. Molecular pathways from the Reactome<sup>6</sup> database were retrieved from archives and included December releases of previous years. We filtered human genes with non-public status and analyzed protein-coding genes of matched versions of the NCBI Consensus Coding Sequence Database<sup>7</sup> (CCDS, <https://www.ncbi.nlm.nih.gov/CCDS>). The closest earlier release of CCDS was used for each annotation dataset. Average path lengths and parent counts of GO terms in 2009 and 2016 were evaluated with permutation tests. Terms were permuted uniformly for 100,000 times and simulated mean values derived from permuted terms were compared with actual mean values derived from observed terms. Each p-value was computed as the number of permutations where values from simulated data exceeded values from observed data over the total number of permutations. Pathways, annotations, and enrichments were analysed with custom R scripts available on request.

**Analysis of gene annotations.** Pathway databases were analyzed for growth in total number of pathway terms separately for the three main ontologies in GO (biological processes, molecular functions, cell components) for each year (2009-2016). The same analysis was repeated for human Reactome pathways and GO annotations for model organisms (mouse, *Arabidopsis thaliana*, fly, yeast). We counted GO terms and Reactome pathways with at least one annotated gene of the studied species. Path lengths and numbers from terms to roots were computed with custom scripts. Human annotations of GO terms and Reactome pathways contained high-confidence protein-coding genes from the nearest previous release of the CCDS database release (e.g. 2015 release for 2016 annotations) and only included genes with public status. Density of human gene annotations was assessed with two-dimensional density plots. For each gene, number of associated processes and pathways (Y-axis) and median size of corresponding gene sets per gene (Y-axis) were shown. The density plots include non-annotated genes (i.e. “dark matter”) for density estimation but are not shown. Dark matter genes were selected as protein-coding genes of the corresponding CCDS

release that had no annotations in GO or Reactome, or only had top-level GO annotations (one or more of biological\_process, cell\_component, molecular\_function). GO biological processes per gene were also estimated for model organisms (mouse, *A. thaliana*, fly, yeast) without filtering of CCDS genes and dark matter. The proportion of missing gene symbols was estimated from earlier CCDS releases relative to the most recent CCDS release of 2015. Quality of human gene annotations was assessed in three mutually exclusive categories – genes with at least one Reactome annotation, genes with at least one non-electronic (non-IEA) annotation in GO, and genes with only IEA (Inferred from Electronic Annotation) annotations in GO. Statistical comparisons of gene annotations across years were conducted with permutation tests similarly to the tests described above.

**Pathway Enrichment Analysis.** Pathway enrichment analysis was conducted on GO biological processes and Reactome pathways using Fisher's exact tests. GO cell components and molecular functions were excluded prior to analysis. Multiple testing was conducted separately for GO and Reactome terms using the Benjamini-Hochberg False Discovery Rate (FDR) procedure. Terms with  $FDR p < 0.05$  were considered significant. Enrichment analysis of GO and Reactome terms conservatively comprised separate background gene sets that included all the genes with at least one gene annotation of biological process (GO) and Reactome pathway, respectively. We chose this general enrichment strategy and did not compare outputs of different tools directly, as direct comparison would be confounded by differences in underlying methods, gene symbol mapping, and filtering of annotation data. Two sets of enrichment analyses were conducted on cancer gene lists using gene annotations from 2016 (corresponding to g:Profiler) and 2010 (corresponding to DAVID). First we analyzed essential breast cancer genes from recent shRNA screens of 77 cell lines<sup>8</sup>. We separately analyzed top-100 and top-500 lists of genes according to per-gene zGARP scores provided by the study. We counted shared, outdated-only, and recent-only gene annotations enriched in the analyses ( $FDR p < 0.05$ ) and matched these using GO and Reactome term identifiers. The most common terms only found in the up-to-date analysis were visualized with the WordCloud R package. To simulate practical analysis, we did not manually convert outdated gene symbols in breast cancer analysis. We also conducted enrichment analyses of essential breast cancer genes after converting these to earlier HGNC symbols via EntrezGene identifiers in the CCDS database. We observed no major differences of analyses performed with converted and unconverted gene symbols. To confirm this observation, we studied the distributions of annotations of genes and found that the genes whose symbols changed between 2010 and 2016 had significantly fewer annotations than the genes with consistent symbols, and 42% of these corresponded to 'dark matter' genes with no annotations in 2010. A similar pathway enrichment analysis was conducted for 75 frequently mutated glioblastoma genes<sup>9,10</sup> derived from the IntOGen database<sup>11</sup>. In this analysis, we manually mapped outdated gene symbols to create a more conservative scenario. We compared enriched annotations across the years 2009-2015 relative to 2016 and counted common and distinct terms as above. We studied the origin of these differences in the context of changed annotations and changed functional vocabulary. We also visualized pathway enrichments of 2010 and 2016 using the Enrichment Map<sup>12</sup> app of Cytoscape<sup>13</sup>. The enrichment map covered pathways with at least four genes. Our observations were also confirmed when this filter was removed and all pathways were included. Functional themes and signaling pathways in the map were curated manually.



## Supplementary Note | Pathway analysis of glioblastoma genes highlights specific processes and druggable pathways missed by earlier annotations

Detailed summary of GBM pathway enrichment results as an Enrichment Map<sup>12</sup> shows biological themes that are missed when using annotations from 2010 (FDR  $P < 0.05$ , **Figure 1e; Supplementary Tables 4-5**). GBM driver genes are enriched in hallmark cancer processes<sup>14</sup> including cell cycle, apoptosis, cell migration, and signaling. These are apparent when analyzing either out-of-date or current annotations, however only few general terms appear in 2010 data.

Enriched pathways in up-to-date analysis are more specific to neuronal context as expected from brain cancer genes. For example, while apoptosis is found in both analyses, neuronal apoptosis only appears in newer analysis ( $n=7$  genes, FDR  $P = 0.018$ ). Similarly, current gene annotations emphasize central nervous system (CNS) development ( $n = 22$ , FDR  $P = 1.63 \times 10^{-8}$ ) as well as neurogenesis ( $n = 26$ , FDR  $P = 1.12 \times 10^{-6}$ ) and gliogenesis ( $n = 7$ , FDR  $P = 0.025$ ), while only CNS development is apparent in older data. Functional themes such as immune response ( $n = 29$ , FDR  $P = 5.2 \times 10^{-5}$ ), neurotransmitter signaling ( $n = 6$ , FDR  $P = 0.0013$ ), circadian clock ( $n = 8$ , FDR  $P = 1.5 \times 10^{-4}$ ) and glucose signaling ( $n = 7$ , FDR  $P = 0.0016$ ) are only highlighted in new annotations. These processes are expected in the context of current knowledge<sup>15,16</sup>, for example enhanced glucose uptake of brain tumor initiating cells helps these overcome nutrient deprivation<sup>17</sup>.

Current pathway analysis also highlights specific signaling pathways relevant to GBM biology and therapy development<sup>18,19,20</sup>. For example, Notch ( $n = 5$ , FDR  $P = 0.0019$ ), TGF- $\beta$  ( $n = 5$ , FDR  $P = 0.027$ ), and fibroblast growth factor ( $n = 12$ , FDR  $P = 1.13 \times 10^{-6}$ ) pathways are only enriched among up-to-date gene annotations and reveal translational hypotheses. Notch is targetable with  $\gamma$ -secretase inhibitors (e.g. R04929097; Roche) for malignant glioma and for progressive GBM that are currently in phase I and phase II trials, respectively<sup>18</sup>. Drugs of the TGF- $\beta$  pathway inhibit the ligand (Trabedersen, Antisense Pharma) or the receptor of the signaling cascade (Galunisertib, Eli Lilly)<sup>21</sup>. The current gene annotations also highlight the enrichment of EGFRvIII<sup>22,23</sup> signaling pathway (*EGFR*, *KRAS*, *PIK3CA*, *PIK3R1*, *SOS1*, FDR  $P = 1.07 \times 10^{-5}$ ). Aberrant EGFR signaling is common to many cancer types, however EGFR kinase inhibitors have been unsuccessful in GBM treatment to date. *EGFR* alterations occur in more than 50% of GBMs<sup>20</sup> and the most common alteration causes deletion of exons 2-7 of the gene, known as the EGFRvIII variant that drives tumor progression and correlates with poor prognosis<sup>24</sup>. The recently developed Rindopepimut vaccine targets EGFRvIII and has entered clinical trial<sup>25</sup>.

These examples demonstrate the limitations of outdated gene annotations. Glioblastoma has extremely poor outcome as the average patient only survives 15 months after diagnosis regardless of surgery and aggressive chemotherapy. The specific processes and pathways with existing drugs highlight avenues for functional follow-up experiments and candidates for future therapy development. Researchers who use outdated software for analyzing their experimental data will miss out on relevant functional and translational hypotheses.

**Supplementary Table 1 | Data update times of web-based pathway enrichment analysis software tools.**

The table shows 25 web-based pathway enrichment analysis tools and the dates of their most recent updates of gene annotation databases. The table reflects information from the web sites of corresponding tools and was compiled in February 2016. The list of tools was compiled from review papers and additional literature searches. We only included tools that allowed analysis of human genes.

| Tool                                 | URL                                                                                                                            | Last update of pathway database | Reference |
|--------------------------------------|--------------------------------------------------------------------------------------------------------------------------------|---------------------------------|-----------|
| <a href="#">GORILLA</a>              | <a href="http://cbl-gorilla.cs.technion.ac.il/">http://cbl-gorilla.cs.technion.ac.il/</a>                                      | 02-2016                         | 26        |
| <a href="#">g:Profiler</a>           | <a href="http://biit.cs.ut.ee/gprofiler/">http://biit.cs.ut.ee/gprofiler/</a>                                                  | 02-2016                         | 27        |
| <a href="#">ToppGene</a>             | <a href="https://toppgene.cchmc.org/">https://toppgene.cchmc.org/</a>                                                          | 02-2016                         | 28        |
| <a href="#">PANTHER</a>              | <a href="http://pantherdb.org/">http://pantherdb.org/</a>                                                                      | 02-2016                         | 29        |
| <a href="#">InterMine Human Mine</a> | <a href="http://intermine.org/">http://intermine.org/</a><br><a href="http://www.humanmine.org/">http://www.humanmine.org/</a> | 11-2015                         | 30        |
| <a href="#">GoEast</a>               | <a href="http://omicslab.genetics.ac.cn/GOEAST/">http://omicslab.genetics.ac.cn/GOEAST/</a>                                    | 11-2015                         | 31        |
| <a href="#">GeneMerge</a>            | <a href="http://www.genemerge.net/">http://www.genemerge.net/</a>                                                              | 09-2015                         | 32        |
| <a href="#">ConsensusPathDB</a>      | <a href="http://consensuspathdb.org/">http://consensuspathdb.org/</a>                                                          | 09-2015                         | 33        |
| <a href="#">GREAT</a>                | <a href="http://bejerano.stanford.edu/great/public/html/">http://bejerano.stanford.edu/great/public/html/</a>                  | 02-2015                         | 34        |
| <a href="#">Babelomics</a>           | <a href="http://babelomics.bioinfo.cipf.es/">http://babelomics.bioinfo.cipf.es/</a>                                            | 12-2014                         | 35        |
| <a href="#">Enrichr</a>              | <a href="http://amp.pharm.mssm.edu/Enrichr/">http://amp.pharm.mssm.edu/Enrichr/</a>                                            | 11-2014                         | 36        |
| <a href="#">FuncAssociate</a>        | <a href="http://llama.mshri.on.ca/funcassociate/">http://llama.mshri.on.ca/funcassociate/</a>                                  | 06-2014                         | 37        |
| <a href="#">gsGator</a>              | <a href="http://gsgator.ewha.ac.kr/">http://gsgator.ewha.ac.kr/</a>                                                            | 01-2014                         | 38        |
| <a href="#">WebGestalt</a>           | <a href="http://bioinfo.vanderbilt.edu/webgestalt/">http://bioinfo.vanderbilt.edu/webgestalt/</a>                              | 01-2013                         | 39        |
| <a href="#">GeneCodis</a>            | <a href="http://genecodis.cnb.csic.es/">http://genecodis.cnb.csic.es/</a>                                                      | 12-2011                         | 40        |
| <a href="#">GoMiner</a>              | <a href="http://discover.nci.nih.gov/gominer/">http://discover.nci.nih.gov/gominer/</a>                                        | 01-2011                         | 41        |
| <a href="#">GeneTrail</a>            | <a href="http://genetrail.bioinf.uni-sb.de/">http://genetrail.bioinf.uni-sb.de/</a>                                            | 09-2010                         | 42        |
| <a href="#">EasyGO</a>               | <a href="http://bioinformatics.cau.edu.cn/easygo/">http://bioinformatics.cau.edu.cn/easygo/</a>                                | 05-2010                         | 43        |

|            |                                                                                                         |         |    |
|------------|---------------------------------------------------------------------------------------------------------|---------|----|
| GARNet     | <a href="http://biome.ewha.ac.kr:8080/GSEAWebApp/">http://biome.ewha.ac.kr:8080/GSEAWebApp/</a>         | 05-2010 | 44 |
| DAVID      | <a href="https://david.ncifcrf.gov/">https://david.ncifcrf.gov/</a>                                     | 01-2010 | 45 |
| ConceptGen | <a href="http://conceptgen.ncibi.org/core/conceptGen/">http://conceptgen.ncibi.org/core/conceptGen/</a> | 11-2009 | 46 |
| GOToolBox  | <a href="http://genome.crg.es/GOToolBox/">http://genome.crg.es/GOToolBox/</a>                           | 07-2009 | 47 |
| L2L        | <a href="http://depts.washington.edu/l2l/">http://depts.washington.edu/l2l/</a>                         | 07-2007 | 48 |
| GoSurfer   | <a href="http://systemsbio.ucsd.edu/GoSurfer/">http://systemsbio.ucsd.edu/GoSurfer/</a>                 | 03-2007 | 49 |
| GOstat     | <a href="http://gostat.wehi.edu.au/">http://gostat.wehi.edu.au/</a>                                     | NA      | 50 |

**Supplementary Table 2 | Citation counts of pathway enrichment analysis software in 2015.**

The table shows 25 different pathway tools, the number of citations per publication, the total number of citations of the tool, and the percentage of all citations in 2015. Lists of primary publications of software tools were collected from respective web sites and augmented with additional literature searchers. Citation counts of these papers were derived from PubMed.

| Tool                   | Citation count 2015 per publication | PMID     | Total citations in 2015 | Total citations in % |
|------------------------|-------------------------------------|----------|-------------------------|----------------------|
| <b>Babelomics</b>      | 2                                   | 16845052 | <b>44</b>               | 1.13                 |
|                        | 5                                   | 15980512 |                         |                      |
|                        | 17                                  | 20478823 |                         |                      |
|                        | 3                                   | 18515841 |                         |                      |
|                        | 2                                   | 25897133 |                         |                      |
|                        | 15                                  | 14990455 |                         |                      |
| <b>ConceptGen</b>      | 6                                   | 20007254 | <b>6</b>                | 0.15                 |
| <b>ConsensusPathDB</b> | 16                                  | 18940869 | <b>79</b>               | 2.04                 |
|                        | 25                                  | 21071422 |                         |                      |
|                        | 38                                  | 23143270 |                         |                      |
|                        | 0                                   | 20847220 |                         |                      |
| <b>DAVID</b>           | 1417                                | 19131956 | <b>2517</b>             | <b>64.89</b>         |
|                        | 261                                 | 12734009 |                         |                      |
|                        | 614                                 | 19033363 |                         |                      |
|                        | 28                                  | 14519205 |                         |                      |
|                        | 72                                  | 17576678 |                         |                      |
|                        | 57                                  | 17784955 |                         |                      |
|                        | 16                                  | 17980028 |                         |                      |
|                        | 21                                  | 19728287 |                         |                      |
|                        | 23                                  | 22543366 |                         |                      |
|                        | 8                                   | 18841237 |                         |                      |
| <b>EasyGO</b>          | 3                                   | 17645808 | <b>3</b>                | 0.08                 |
| <b>Enrichr</b>         | 61                                  | 23586463 | <b>61</b>               | 1.57                 |
| <b>FuncAssociate</b>   | 13                                  | 19717575 | <b>21</b>               | 0.54                 |

|                   |     |          |            |      |
|-------------------|-----|----------|------------|------|
|                   | 8   | 14668247 |            |      |
| <b>g:Profiler</b> | 26  | 17478515 | <b>74</b>  | 1.91 |
|                   | 48  | 21646343 |            |      |
| <b>GARNet</b>     | 0   | 21342555 | <b>0</b>   | 0    |
| <b>GeneCodis</b>  | 31  | 17204154 | <b>108</b> | 2.78 |
| <b>GeneMerge</b>  | 4   | 12724301 | <b>4</b>   | 0.10 |
|                   | 28  | 19465387 |            |      |
|                   | 45  | 22573175 |            |      |
| <b>GeneTrail</b>  | 12  | 17526521 | <b>14</b>  | 0.36 |
|                   | 2   | 21592396 |            |      |
| <b>GoEast</b>     | 32  | 18487275 | <b>40</b>  | 1.03 |
|                   | 8   | 19615110 |            |      |
| <b>GoMiner</b>    | 26  | 12702209 | <b>33</b>  | 0.85 |
|                   | 7   | 15998470 |            |      |
| <b>GORILLA</b>    | 134 | 19192299 | <b>134</b> | 3.45 |
| <b>GoSurfer</b>   | 1   | 15702958 | <b>1</b>   | 0.03 |
| <b>GOstat</b>     | 24  | 14962934 | <b>24</b>  | 0.62 |
| <b>GOToolBox</b>  | 3   | 15575967 | <b>3</b>   | 0.08 |
| <b>GREAT</b>      | 142 | 20436461 | <b>145</b> | 3.74 |
| <b>gsGator</b>    | 0   | 24423189 | <b>0</b>   | 0.00 |
|                   | 3   | 23814184 |            |      |
| <b>InterMine</b>  | 22  | 22434830 | <b>50</b>  | 1.29 |
|                   | 17  | 17615057 |            |      |
|                   | 9   | 22080565 |            |      |
|                   | 1   | 26092688 |            |      |
|                   | 1   | 25414324 |            |      |
| <b>L2L</b>        | 0   | 16168088 | <b>0</b>   | 0    |
| <b>PANTHER</b>    | 16  | 19597783 | <b>242</b> | 6.24 |
|                   | 8   | 17130144 |            |      |
|                   | 132 | 23193289 |            |      |
|                   | 86  | 23868073 |            |      |
| <b>ToppGene</b>   | 72  | 19465376 | <b>72</b>  | 1.86 |
| <b>Webgestalt</b> | 89  | 15980575 | <b>204</b> | 5.26 |

|              |     |          |             |            |
|--------------|-----|----------|-------------|------------|
|              | 113 | 23703215 |             |            |
|              | 2   | 24233776 |             |            |
|              | 0   | 26656494 |             |            |
|              | 20  | 18511468 |             |            |
| <b>TOTAL</b> |     |          | <b>3879</b> | <b>100</b> |

**Supplementary Table 3 | GO, Reactome, and CCDS databases used in the study.**

The following versions of GO, Reactome, and CCDS databases were used for each year to analyze data described in this manuscript.

| Year | GO ontology data version | GO annotations version | Reactome version | CCDS version |
|------|--------------------------|------------------------|------------------|--------------|
| 2009 | NA                       | 70                     | 27               | 2009-09-02   |
| 2010 | 1.1.939                  | 81                     | 31               | 2009-09-02*  |
| 2011 | 1.1.1689                 | 93                     | 35               | 2011-09-07   |
| 2012 | 1.1.2572                 | 106                    | 39               | 2012-10-25   |
| 2013 | 2012-12-31               | 117                    | 43               | 2013-11-29   |
| 2014 | 2013-12-20               | 129                    | 47               | 2014-08-07   |
| 2015 | 2014-12-22               | 140                    | 51               | 2015-05-12   |
| 2016 | 2015-12-22               | 152                    | 55               | 2015-05-12*  |

\*CCDS database from previous year was used as no CCDS is available for that year.

**Supplementary Table 4 | Enriched pathways and processes of glioblastoma genes that remain undetected in 2010-era annotations.**

We found nine major themes (i.e. groups of related pathways and processes) out of 28 that were only detected as significant when analyzing recent annotations from 2016. Similarly, new sub-pathways (spread across different major themes) were discovered only when using up-to-date gene annotations. Color indicates type of detected pathway: pathways only discovered in 2016-era annotations (pink), and pathways commonly discovered in annotations of 2010 and 2016 (yellow).

| Major themes/ pathways                 | Sub-pathways                                                                          |
|----------------------------------------|---------------------------------------------------------------------------------------|
| <b>Catabolism</b>                      | Protein catabolism, RNA catabolism                                                    |
| <b>GABAergic synaptic transmission</b> | Synaptic plasticity, neurotransmitter transport                                       |
| <b>Cognition/ learning/ behaviour</b>  | Visual behaviour, associative learning, memory, cognition                             |
| <b>Glucose import/ transport</b>       | Carbohydrate homeostasis, response to glucose stimulus                                |
| <b>Circadian clock</b>                 | Regulation of circadian rhythm, BMAL1:CLOCK:NPAS2 activates circadian gene expression |
| <b>Wound healing</b>                   | Coagulation, platelet activation, homeostasis                                         |
| <b>Immune signalling</b>               | Fc receptor signalling pathway, TCR signalling, cytokine signalling                   |
| <b>Homeostasis</b>                     | Chemical homeostasis, tissue homeostasis                                              |
| <b>Endocytosis</b>                     | Vesicle-mediated transport, receptor-mediated endocytosis                             |
| <b>Adhesion</b>                        | Cell-matrix adhesion, cell-substrate adhesion                                         |
| <b>Response to stimulus</b>            | Response to cAMP/ purine-containing compound                                          |
|                                        | Response to EGF                                                                       |
|                                        | Response to UV                                                                        |
|                                        | Response to stress                                                                    |
|                                        | Response to metal ion/ inorganic substances                                           |
|                                        | Response to TGF $\beta$                                                               |
| <b>Cellular component organization</b> | RNP complex biogenesis/ assembly                                                      |
|                                        | Negative regulation of organelle / cellular component organization                    |
| <b>Histones &amp; chromatin</b>        | H3-K9 methylation                                                                     |
|                                        | Histone acetylation/ peptidyl-lysine acetylation                                      |
|                                        | Chromatin (dis)assembly                                                               |



|                                       |                                                  |
|---------------------------------------|--------------------------------------------------|
|                                       | DNA alkylation/ (de)methylation                  |
|                                       | Histone H3 acetylation                           |
|                                       | Histone deacetylation                            |
|                                       | Peptidyl-lysine acetylation                      |
|                                       | Nucleosome organization                          |
|                                       | Histone H3-K9 acetylation                        |
|                                       | Chromatin modifying enzymes                      |
| <b>DNA replication/ CC checkpoint</b> | Regulation of DNA replication                    |
| <b>Cell cycle/ mitosis</b>            | mitotic CC phase transition                      |
|                                       | Chromosome segregation/ meta-anaphase transition |
|                                       | Sister chromatid cohesion                        |
|                                       | Sister chromatid segregation                     |
| <b>Apoptosis/ Neuron death</b>        | Neuron death regulation                          |
|                                       | Chromosome breakage/ programmed DNA elimination  |
|                                       | Fibroblast apoptotic process                     |
|                                       | Neuron apoptotic process                         |
|                                       | Cell death signalling via NRAGE/ NRIF/ NADE      |
|                                       | Mesenchymal apoptotic process                    |
|                                       | p75 NTR receptor-mediated signalling             |
|                                       | Cell type specific apoptotic process             |
| <b>Protein import/ localization</b>   | Protein localization to membrane                 |
|                                       | ECM organization                                 |
|                                       | Potassium ion transmembrane transport            |
|                                       | protein import into nucleus                      |
| <b>Metabolism</b>                     | Regulation of ROS                                |
|                                       | Regulation of TNF                                |
| <b>Signalling</b>                     | EGFRvIII                                         |
|                                       | FGFR                                             |
|                                       | Notch                                            |
|                                       | VEGF                                             |

|                    |                           |
|--------------------|---------------------------|
|                    | ERK1 and ERK2 cascade     |
|                    | ERBB                      |
|                    | TGF $\beta$               |
| <b>Development</b> | Tube                      |
|                    | Neuro/ axono/ gliogenesis |
|                    | Cartilage                 |
|                    | Head/ body/ face          |
|                    | Trachea                   |
|                    | Eye                       |
|                    | Sertoli cell              |
|                    | Liver                     |
|                    | Pattern specification     |

**Supplementary Table 5a | GBM-associated GO terms of the 2016 analysis compared to 2010.**

The table shows the top most significant GO terms in 2016 ranked by FDR adjusted p-values compared to FDR p-values detected in 2010.

| GO.ID      | Description                                            | FDR      | Common genes                                                                                                                                                                                                                                                                                                    | FDR of GO.ID in 2010 |
|------------|--------------------------------------------------------|----------|-----------------------------------------------------------------------------------------------------------------------------------------------------------------------------------------------------------------------------------------------------------------------------------------------------------------|----------------------|
| GO:0009893 | positive regulation of metabolic process               | 2.69E-14 | AKAP9,ANK3,ARFGEF2,ARHGAP35,ARHGEF6,ARID1A,ATRAX,BPTF,BRAF,BRCA1,CASP1,CHD8,CLOCK,CNOT1,CUL1,DIS3,EGFR,EZH2,FN1,HSP90AB1,KALRN,KDM6A,KDR,KRAS,LRP6,MAP3K4,MAP4K3,MEN1,MET,NCOR1,NEDD4L,NF1,NFATC4,NR2F2,PAX5,PIK3CA,PIK3CB,PIK3R1,PTEN,PTPN11,RB1,SF3B1,SIN3A,SOS1,SOX9,SPTAN1,STAG2,TGFBR2,TP53,TRIO,WT1,KMT2A | 0.005040439          |
| GO:0010604 | positive regulation of macromolecule metabolic process | 2.61E-13 | AKAP9,ANK3,ARID1A,ATRAX,BPTF,BRAF,BRCA1,CASP1,CHD8,CLOCK,CNOT1,CUL1,EGFR,EZH2,FN1,HSP90AB1,KDM6A,KDR,KRAS,LRP6,MAP3K4,MAP4K3,MEN1,MET,NCOR1,NEDD4L,NF1,NFATC4,NR2F2,PAX5,PIK3CA,PIK3CB,PIK3R1,PTEN,PTPN11,RB1,SF3B1,SIN3A,SOS1,SOX9,SPTAN1,STAG2,TGFBR2,TP53,WT1,KMT2A                                          | 0.024811057          |
| GO:0070887 | cellular response to chemical stimulus                 | 5.20E-13 | ADAM10,AKAP9,ANK3,ARHGEF6,ATRAX,BPTF,BRAF,BRCA1,CAD,CASP1,CUL1,EGFR,EZH2,FN1,HDAC9,HSP90AB1,KALRN,KDR,KRAS,LRP6,MAX,MEN1,MET,NCOR1,NEDD4L,NF1,NFATC4,NR2F2,NUP107,PIK3CA,PIK3CB,PIK3R1,PRPF8,PTEN,PTPN11,RB1,SIN3A,SOS1,SOX9,SPTAN1,TGFBR2,TP53,TRIO,WT1,KMT2A                                                  | ND                   |

|            |                                               |          |                                                                                                                                                                                                                                                                                                                                                                                      |             |
|------------|-----------------------------------------------|----------|--------------------------------------------------------------------------------------------------------------------------------------------------------------------------------------------------------------------------------------------------------------------------------------------------------------------------------------------------------------------------------------|-------------|
| GO:0048856 | anatomical structure development              | 2.30E-12 | ADAM10,AKAP9,ANK3,ARHGAP35,ARID1A,ATRX,BPTF,BRAF,BRCA1,CAD,CARM1,CHD8,CLOCK,CNOT1,CSDE1,CUL1,EGFR,EZH2,FAT1,FN1,HDAC9,HSP90AB1,IDH1,KALRN,KDM6A,KDR,KRAS,LRP6,MAP3K4,MAX,MEN1,MET,NCOR1,NEDD4L,NF1,NFATC4,NR2F2,PAX5,PBRM1,PCDH18,PIK3CA,PIK3CB,PIK3R1,PTEN,PTPN11,RB1,SF3B1,SIN3A,SOS1,SOX9,SPTAN1,TGFBR2,TJP1,TP53,TRIO,WT1,RPSA,KMT2A                                             | 0.002983586 |
| GO:0019222 | regulation of metabolic process               | 2.70E-12 | ACAD8,AKAP9,ANK3,ARHGEF2,ARHGAP35,ARHGEF6,ARID1A,ARID2,ATRX,BPTF,BRAF,BRCA1,CARM1,CASP1,CHD8,CLOCK,CLTC,CNOT1,CSDE1,CUL1,DIS3,EGFR,EZH2,FN1,HDAC9,HSP90AB1,IDH1,KALRN,KDM5C,KDM6A,KDR,KRAS,LRP6,MAP3K4,MAP4K3,MAX,MEN1,MET,NCOR1,NEDD4L,NF1,NFATC4,NR2F2,NUP107,PAX5,PBRM1,PIK3CA,PIK3CB,PIK3R1,PTEN,PTPN11,RB1,SF3B1,SIN3A,SOS1,SOX9,SPTAN1,STAG2,TGFBR2,TP53,TRIO,WT1,ZNF814,KMT2A | 0.000413789 |
| GO:0071840 | cellular component organization or biogenesis | 2.75E-12 | ADAM10,AKAP9,ANK3,ARHGEF2,ARHGAP35,ARHGEF6,ARID1A,ARID2,ATRX,BAP1,BPTF,BRAF,BRCA1,CARM1,CHD8,CLOCK,CLTC,CNOT1,DIS3,EGFR,EZH2,FAT1,FN1,HDAC9,HSP90AB1,KALRN,KDM5C,KDM6A,KDR,KRAS,LRP6,MAP3K4,MAX,MEN1,MET,NCOR1,NEDD4L,NF1,NFATC4,NUP107,PAX5,PBRM1,PIK3CA,PIK3CB,PIK3R1,PRPF8,PTEN,PTPN11,RB1,RPL5,SF3B1,SIN3A,SOS1,SOX9,SPTAN1,STAG2,TJP1,TP53,TRIO,WT1,RPSA,KMT2A                  | ND          |

|            |                                          |          |                                                                                                                                                                                                                                                                                                                                                                                                                      |             |
|------------|------------------------------------------|----------|----------------------------------------------------------------------------------------------------------------------------------------------------------------------------------------------------------------------------------------------------------------------------------------------------------------------------------------------------------------------------------------------------------------------|-------------|
| GO:0044260 | cellular macromolecule metabolic process | 2.75E-12 | ACAD8,ADAM10,AKAP9,ANK3,AQR,ARFGEF2,ARHGAP35,ARHGEF6,ARID1A,ARID2,ATRX,BAP1,BPTF,BRAF,BRCA1,CAD,CARM1,CASP1,CHD8,CLOCK,CLTC,CNOT1,CSDE1,CUL1,DIS3,EGFR,EZH2, FN1,HDAC9,HSP90AB1,KALRN,KDM5C,KDM6A,KDR,KRAS,LRP6,MAP3K4,MAP4K3,MAX,MEN1,MET,NCOR1,NEDD4L,NF1,NFATC4,NR2F2,NUP107,PAX5,PBRM1,PIK3CA,PIK3CB,PIK3R1,PRPF8,PTEN,PTPN11,RB1,RPL5,SF3B1,SIN3A,SOS1,SOX9,SPTAN1,STAG2,TGFBR2,TP53,TRIO,WT1,ZNF814,RPSA,KMT2A | 3.94E-06    |
| GO:0007275 | multicellular organismal development     | 5.30E-12 | ADAM10,AKAP9,ANK3,ARHGAP35,ARID1A,ATRX,BPTF,BRAF,BRCA1,CAD,CARM1,CHD8,CLOCK,CNOT1,CSDE1,CUL1,EGFR,EZH2, FN1,HDAC9,HSP90AB1,IDH1,KALRN,KDM6A,KDR,KRAS,LRP6,MAP3K4,MAX,MEN1,MET,NCOR1,NEDD4L,NF1,NFATC4,NR2F2,PAX5,PBRM1,PCDH18,PIK3CA,PIK3CB,PIK3R1,PTEN,PTPN11,RB1,SF3B1,SIN3A,SOS1,SOX9,SPTAN1,TGFBR2,TJP1,TP53,TRIO,WT1,KMT2A                                                                                      | 0.000751915 |
| GO:0016043 | cellular component organization          | 5.30E-12 | ADAM10,AKAP9,ANK3,ARFGEF2,ARHGAP35,ARHGEF6,ARID1A,ARID2,ATRX,BAP1,BPTF,BRAF,BRCA1,CARM1,CHD8,CLOCK,CLTC,CNOT1,EGFR,EZH2,FAT1, FN1,HDAC9,HSP90AB1,KALRN,KDM5C,KDM6A,KDR,KRAS,LRP6,MAP3K4,MAX,MEN1,MET,NCOR1,NEDD4L,NF1,NFATC4,NUP107,PAX5,PBRM1,PIK3CA,PIK3CB,PIK3R1,PRPF8,PTEN,PTPN11,RB1,RPL5,SF3B1,SIN3A,SOS1,SOX9,SPTAN1,STAG2,TJP1,TP53,TRIO,WT1,RPSA,KMT2A                                                      | 1.6E-04     |

|            |                        |          |                                                                                                                                                                                                                                                                                                                                                      |             |
|------------|------------------------|----------|------------------------------------------------------------------------------------------------------------------------------------------------------------------------------------------------------------------------------------------------------------------------------------------------------------------------------------------------------|-------------|
| GO:0048731 | system development     | 6.03E-12 | ADAM10,AKAP9,ANK3,ARHGAP35,ARID1A,ATRX,BPTF,BRAF,BRCA1,CAD,CARM1,CHD8,CLOCK,CSDE1,CUL1,EGFR,EZH2,FN1,HDAC9,HSP90AB1,IDH1,KALRN,KDM6A,KDR,KRAS,LRP6,MAP3K4,MAX,MEN1,MET,NCOR1,NEDD4L,NF1,NFATC4,NR2F2,PAX5,PBRM1,PCDH18,PIK3CA,PIK3CB,PIK3R1,PTEN,PTPN11,RB1,SIN3A,SOS1,SOX9,SPPTAN1,TGFBR2,TP53,TRIO,WT1,KMT2A                                       | 0.005167947 |
| GO:0032502 | developmental process  | 6.07E-12 | ADAM10,AKAP9,ANK3,ARHGAP35,ARID1A,ATRX,BPTF,BRAF,BRCA1,CAD,CARM1,CHD8,CLOCK,CLTC,CNOT1,CSDE1,CUL1,EGFR,EZH2,FAT1,FN1,HDAC9,HSP90AB1,IDH1,KALRN,KDM6A,KDR,KRAS,LRP6,MAP3K4,MAX,MEN1,MET,NCOR1,NEDD4L,NF1,NFATC4,NR2F2,PAX5,PBRM1,PCDH18,PIK3CA,PIK3CB,PIK3R1,PTEN,PTPN11,RB1,SF3B1,SIN3A,SOS1,SOX9,SPPTAN1,STAG2,TGFBR2,TJP1,TP53,TRIO,WT1,RPSA,KMT2A | 0.000751915 |
| GO:0016568 | chromatin modification | 8.74E-12 | ARID1A,ARID2,ATRX,BAP1,BPTF,BRCA1,CARM1,CHD8,CLOCK,EZH2,HDAC9,KDM5C,KDM6A,MEN1,NCOR1,PAX5,PBRM1,RB1,SIN3A,SOX9,TP53,KMT2A                                                                                                                                                                                                                            | 1.06E-07    |
| GO:0048513 | organ development      | 1.03E-11 | AKAP9,ARHGAP35,ARID1A,ATRX,BPTF,BRAF,BRCA1,CAD,CARM1,CHD8,CLOCK,CSDE1,CUL1,EGFR,EZH2,HDAC9,HSP90AB1,IDH1,KDM6A,KDR,KRAS,LRP6,MAP3K4,MAX,MEN1,MET,NCOR1,NF1,NFATC4,NR2F2,PAX5,PBRM1,PCDH18,PIK3CA,PIK3R1,PTEN,PTPN11,RB1,SIN3A,SOS1,SOX9,TGFBR2,TP53,WT1,KMT2A                                                                                        | 0.000800217 |

|            |                                               |          |                                                                                                                                                                                                                                                                                                                                                       |             |
|------------|-----------------------------------------------|----------|-------------------------------------------------------------------------------------------------------------------------------------------------------------------------------------------------------------------------------------------------------------------------------------------------------------------------------------------------------|-------------|
| GO:0060255 | regulation of macromolecule metabolic process | 1.03E-11 | ACAD8,AKAP9,ANK3,ARHGAP35,ARID1A,ARID2,ATRX,BPTF,BRAF,BRCA1,CARM1,CASP1,CHD8,CLOCK,CLTC,CNOT1,CSDE1,CUL1,DIS3,EGFR,EZH2,FN1,HDAC9,HSP90AB1,KDM5C,KDM6A,KDR,KRAS,LRP6,MAP3K4,MAP4K3,MAX,MEN1,MET,NCOR1,NEDD4L,NF1,NFATC4,NR2F2,NUP107,PAX5,PBRM1,PIK3CA,PIK3CB,PIK3R1,PTEN,PTPN11,RB1,SF3B1,SIN3A,SOS1,SOX9,SPTAN1,STAG2,TGFB R2,TP53,WT1,ZNF814,KMT2A | 0.002467951 |
| GO:0044767 | single-organism developmental process         | 1.46E-11 | ADAM10,AKAP9,ANK3,ARHGAP35,ARID1A,ATRX,BPTF,BRAF,BRCA1,CAD,CARM1,CHD8,CLOCK,CLTC,CNOT1,CSDE1,CUL1,EGFR,EZH2,FN1,HDAC9,HSP90AB1,IDH1,KALRN,KDM6A,KDR,KRAS,LRP6,MAP3K4,MAX,MEN1,MET,NCOR1,NEDD4L,NF1,NFATC4,NR2F2,PAX5,PBRM1,PCDH18,PIK3CA,PIK3CB,PIK3R1,PTEN,PTPN11,RB1,SF3B1,SIN3A,SOS1,SOX9,SPTAN1,STAG2,TGFB R2,TJP1,TP53,TRIO,WT1,RPSA,KMT2A       | ND          |
| GO:0010033 | response to organic substance                 | 3.16E-11 | ADAM10,AKAP9,ARHGAP35,ATRX,BPTF,BRAF,BRCA1,CAD,CARM1,CASP1,CUL1,EGFR,EZH2,FN1,HDAC9,HSP90AB1,IDH1,KALRN,KDR,KRAS,LRP6,MAP4K3,MAX,MEN1,NCOR1,NEDD4L,NF1,NR2F2,NUP107,PIK3CA,PIK3CB,PIK3R1,PRPF8,PTEN,PTPN11,SIN3A,SOS1,SOX9,SPTAN1,TGFB R2,TP53,TRIO,WT1                                                                                               | 0.032600063 |

|            |                                                   |          |                                                                                                                                                                                                                                               |             |
|------------|---------------------------------------------------|----------|-----------------------------------------------------------------------------------------------------------------------------------------------------------------------------------------------------------------------------------------------|-------------|
| GO:0009653 | anatomical structure morphogenesis                | 8.42E-11 | ADAM10,AKAP9,ANK3,ARHGAP35,ARID1A,ATRX,BRAF,BRCA1,CARM1,CUL1,EGFR,EZH2,FAT1,FN1,HDAC9,HSP90AB1,KALRN,KDM6A,KDR,KRAS,LRP6,MET,NEDD4L,NF1,NFATC4,NR2F2,PAX5,PIK3CA,PIK3CB,PTEN,PTPN11,RB1,SF3B1,SOS1,SOX9,SPTAN1,TGFBR2,TJP1,TP53,TRIO,WT1      | 0.00126693  |
| GO:0031325 | positive regulation of cellular metabolic process | 8.42E-11 | AKAP9,ARID1A,ATRX,BPTF,BRAF,BRCA1,CASP1,CHD8,CLOCK,CNOT1,CUL1,EGFR,EZH2,FN1,HSP90AB1,KDR,KRAS,LRP6,MAP3K4,MAP4K3,MEN1,MET,NCOR1,NF1,NFATC4,NR2F2,PAX5,PIK3CA,PIK3CB,PIK3R1,PTEN,PTPN11,RB1,SIN3A,SOS1,SOX9,SPTAN1,STAG2,TGFBR2,TP53,WT1,KMT2A | 0.003630204 |
| GO:0048608 | reproductive structure development                | 8.42E-11 | AKAP9,ARID1A,ATRX,BPTF,CSDE1,EGFR,HSP90AB1,IDH1,KDR,LRP6,MAP3K4,MEN1,MET,NR2F2,PBRM1,PTEN,PTPN11,SOX9,WT1                                                                                                                                     | 0.015434574 |
| GO:0071363 | cellular response to growth factor stimulus       | 8.42E-11 | AKAP9,ARHGEF6,BPTF,BRAF,CAD,EGFR,FN1,KALRN,KDR,KRAS,MEN1,NCOR1,NEDD4L,NF1,PIK3CA,PIK3CB,PIK3R1,PTEN,PTPN11,SOS1,SOX9,SPTAN1,TGFBR2,TP53,TRIO                                                                                                  | <b>ND</b>   |
| GO:0061458 | reproductive system development                   | 8.63E-11 | AKAP9,ARID1A,ATRX,BPTF,CSDE1,EGFR,HSP90AB1,IDH1,KDR,LRP6,MAP3K4,MEN1,MET,NR2F2,PBRM1,PTEN,PTPN11,SOX9,WT1                                                                                                                                     | <b>ND</b>   |



|            |                                 |          |                                                                                                                                                                                                                                                                                                                                                                                                                      |             |
|------------|---------------------------------|----------|----------------------------------------------------------------------------------------------------------------------------------------------------------------------------------------------------------------------------------------------------------------------------------------------------------------------------------------------------------------------------------------------------------------------|-------------|
| GO:0043170 | macromolecule metabolic process | 9.74E-11 | ACAD8,ADAM10,AKAP9,ANK3,AQR,ARHGEF2,ARHGAP35,ARHGEF6,ARID1A,ARID2,ATRX,BAP1,BPTF,BRAF,BRCA1,CAD,CARM1,CASP1,CHD8,CLOCK,CLTC,CNOT1,CSDE1,CUL1,DIS3,EGFR,EZH2, FN1,HDAC9,HSP90AB1,KALRN,KDM5C,KDM6A,KDR,KRAS,LRP6,MAP3K4,MAP4K3,MAX,MEN1,MET,NCOR1,NEDD4L,NF1,NFATC4,NR2F2,NUP107,PAX5,PBRM1,PIK3CA,PIK3CB,PIK3R1,PRPF8,PTEN,PTPN11,RB1,RPL5,SF3B1,SIN3A,SOS1,SOX9,SPTAN1,STAG2,TGFBR2,TP53,TRIO,WT1,ZNF814,RPSA,KMT2A | 2.36E-05    |
| GO:0007399 | nervous system development      | 1.08E-10 | ADAM10,AKAP9,ANK3,ARHGAP35,ARID1A,ATRX,BPTF,BRAF,BRCA1,CARM1,CHD8,EGFR,EZH2, FN1,HDAC9,HSP90AB1,KALRN,KDM6A,KRAS,LRP6,MEN1,MET,NCOR1,NEDD4L,NF1,NFATC4,NR2F2,PAX5,PCDH18,PTEN,PTPN11,RB1,SOS1,SOX9,SPTAN1,TGFBR2,TP53,TRIO                                                                                                                                                                                           | ND          |
| GO:0010467 | gene expression                 | 1.23E-10 | ACAD8,ADAM10,ANK3,AQR,ARHGAP35,ARID1A,ARID2,ATRX,BPTF,BRAF,BRCA1,CARM1,CASP1,CHD8,CLOCK,CNOT1,CSDE1,DIS3,EGFR,EZH2, FN1,HDAC9,KDM5C,KDM6A,KRAS,LRP6,MAP3K4,MAX,MEN1,MET,NCOR1,NEDD4L,NF1,NFATC4,NR2F2,NUP107,PAX5,PBRM1,PIK3CA,PIK3CB,PIK3R1,PRPF8,PTEN, RB1,RPL5,SF3B1,SIN3A,SOX9,STAG2,TGFBR2,TP53,WT1,ZNF814,RPSA,KMT2A                                                                                           | 0.000703641 |
| GO:0070848 | response to growth factor       | 1.23E-10 | AKAP9,ARHGEF6,BPTF,BRAF,CAD,EGFR, FN1,KALRN,KDR,KRAS,MEN1,NCOR1,NEDD4L,NF1,PIK3CA,PIK3CB,PIK3R1,PTEN,PTPN11,SOS1,SOX9,SPTAN1,TGFBR2,TP53,TRIO                                                                                                                                                                                                                                                                        | ND          |

|            |                                           |          |                                                                                                                                                                                                                                                                                                                                         |          |
|------------|-------------------------------------------|----------|-----------------------------------------------------------------------------------------------------------------------------------------------------------------------------------------------------------------------------------------------------------------------------------------------------------------------------------------|----------|
| GO:0048518 | positive regulation of biological process | 1.23E-10 | ADAM10,AKAP9,ANK3,ARFG EF2,ARHGAP35,ARHGEF6,ARID1A,ATRX,BAP1,BPTF,BRAF,BRCA1,CARM1,CASP1,CHD8,CLOCK,CNOT1,CUL1,DIS3,EGFR,EZH2,FN1,HDAC9,HSP90AB1,KALRN,KDM6A,KDR,KRAS,LRP6,MAP3K4,MAP4K3,MEN1,MET,NCOR1,NEDD4L,NF1,NFATC4,NR2F2,PAX5,PIK3CA,PIK3CB,PIK3R1,PTEN,PTPN11,RB1,SF3B1,SIN3A,SOS1,SOX9,SPTAN1,STAG2,TGFBR2,TP53,TRIO,WT1,KMT2A | 3.11E-05 |
| GO:0048522 | positive regulation of cellular process   | 1.61E-10 | ADAM10,AKAP9,ANK3,ARHGAP35,ARHGEF6,ARID1A,ATRX,BAP1,BPTF,BRAF,BRCA1,CARM1,CASP1,CHD8,CLOCK,CNOT1,CUL1,EGFR,EZH2,FN1,HDAC9,HSP90AB1,KALRN,KDR,KRAS,LRP6,MAP3K4,MAP4K3,MEN1,MET,NCOR1,NEDD4L,NF1,NFATC4,NR2F2,PAX5,PIK3CA,PIK3CB,PIK3R1,PTEN,PTPN11,RB1,SIN3A,SOS1,SOX9,SPTAN1,STAG2,TGFBR2,TP53,TRIO,WT1,KMT2A                           | 5.84E-06 |
| GO:0051276 | chromosome organization                   | 1.76E-10 | ARID1A,ARID2,ATRX,BAP1,BPTF,BRCA1,CARM1,CHD8,CLOCK,EZH2,HDAC9,KDM5C,KDM6A,MAP3K4,MEN1,NCOR1,NUP107,PAX5,PBRM1,PTEN,RB1,SIN3A,SOX9,STAG2,TP53,KMT2A                                                                                                                                                                                      | 1.34E-06 |
| GO:0006325 | chromatin organization                    | 1.88E-10 | ARID1A,ARID2,ATRX,BAP1,BPTF,BRCA1,CARM1,CHD8,CLOCK,EZH2,HDAC9,KDM5C,KDM6A,MEN1,NCOR1,PAX5,PBRM1,RB1,SIN3A,SOX9,TP53,KMT2A                                                                                                                                                                                                               | 1.95E-06 |

|            |                               |          |                                                                                                                                                                                                                                                                                         |             |
|------------|-------------------------------|----------|-----------------------------------------------------------------------------------------------------------------------------------------------------------------------------------------------------------------------------------------------------------------------------------------|-------------|
| GO:0010468 | regulation of gene expression | 1.89E-10 | ACAD8,ANK3,ARHGAP35,ARID1A,ARID2,ATRX,BPTF,BRAF,BRCA1,CARM1,CHD8,CLOCK,CNOT1,CSDE1,DIS3,EGFR,EZH2,FN1,HDAC9,KDM5C,KDM6A,KRAS,LRP6,MAP3K4,MAX,MEN1,MET,NCOR1,NEDD4L,NF1,NFATC4,NR2F2,NUP107,PAX5,PBRM1,PIK3CA,PIK3CB,PIK3R1,PTEN,RB1,SF3B1,SIN3A,SOX9,STAG2,TGFBR2,TP53,WT1,ZNF814,KMT2A | 0.004212933 |
|------------|-------------------------------|----------|-----------------------------------------------------------------------------------------------------------------------------------------------------------------------------------------------------------------------------------------------------------------------------------------|-------------|

**Supplementary Table 5b | GBM-associated Reactome pathways of the 2016 analysis compared to 2010.**

The table shows the top most significant Reactome terms in 2016 ranked by FDR adjusted p-values compared to FDR p-values detected in 2010.

| React.ID      | Description                        | FDR      | Common genes                                                                                                                        | FDR of Reactome.ID in 2010 |
|---------------|------------------------------------|----------|-------------------------------------------------------------------------------------------------------------------------------------|----------------------------|
| R-HSA-1266738 | Developmental Biology              | 3.44E-06 | ADAM10,AKAP9,ANK3,ARH GAP35,BRAF,CARM1,CLTC,EGFR,EZH2,FN1,HSP90AB1,KALRN,KDM6A,KDR,KRAS,MET,NCOR1,NF1,NR2F2,PTPN11,SOS1,SPTAN1,TRIO | ND                         |
| R-HSA-210993  | Tie2 Signaling                     | 3.44E-06 | KRAS,PIK3CA,PIK3CB,PIK3R1,PTPN11,SOS1                                                                                               | 1.26E-05                   |
| R-HSA-1236394 | Signaling by ERBB4                 | 3.54E-06 | AKAP9,BRAF,CUL1,EGFR, FN1,KRAS,NCOR1,NF1,PIK3CA,PIK3CB,PIK3R1,PTEN,PTPN11,SOS1,SPTAN1                                               | ND                         |
| R-HSA-422475  | Axon guidance                      | 9.12E-06 | ADAM10,AKAP9,ANK3,ARH GAP35,BRAF,CLTC,EGFR, FN1,HSP90AB1,KALRN,KDR,KRAS,MET,NF1,PTPN11,SOS1,SPTAN1,TRIO                             | ND                         |
| R-HSA-5637810 | Constitutive Signaling by EGFRvIII | 1.58E-05 | EGFR,KRAS,PIK3CA,PIK3R1,SOS1                                                                                                        | ND                         |
| R-HSA-5637812 | Signaling by EGFRvIII in Cancer    | 1.58E-05 | EGFR,KRAS,PIK3CA,PIK3R1,SOS1                                                                                                        | ND                         |
| R-HSA-5663202 | Diseases of signal transduction    | 1.67E-05 | ADAM10,CUL1,EGFR,HDC9,KRAS,LRP6,NCOR1,PIK3CA,PIK3CB,PIK3R1,PTPN11,SOS1,TGFBR2                                                       | ND                         |
| R-HSA-166520  | Signalling by NGF                  | 1.67E-05 | AKAP9,ARHGEF6,BRAF,EGFR, FN1,KALRN,KRAS,NF1,PIK3CA,PIK3CB,PIK3R1,PTEN,PTPN11,SOS1,SPTAN1,TRIO                                       | 0.00410468                 |
| R-HSA-449147  | Signaling by Interleukins          | 1.76E-05 | AKAP9,BRAF,CASP1,CUL1,EGFR, FN1,KRAS,NF1,PIK3CA,PIK3CB,PIK3R1,PTPN11,SOS1,SPTAN1                                                    | ND                         |
| R-HSA-177929  | Signaling by EGFR                  | 2.31E-05 | ADAM10,AKAP9,BRAF,EGFR, FN1,KRAS,NF1,PIK3CA,PIK3CB,PIK3R1,PTEN,PTPN11,SOS1,SPTAN1                                                   | 1.26E-05                   |

|               |                                                                  |          |                                                                                                                      |    |
|---------------|------------------------------------------------------------------|----------|----------------------------------------------------------------------------------------------------------------------|----|
| R-HSA-1236382 | Constitutive Signaling by Ligand-Responsive EGFR Cancer Variants | 2.39E-05 | EGFR,KRAS,PIK3CA,PIK3R1,SOS1                                                                                         | ND |
| R-HSA-1643685 | Disease                                                          | 2.39E-05 | ADAM10,CUL1,EGFR,HDAC9,HSP90AB1,IDH1,KRAS,LRP6,NCOR1,NEDD4L,NUP107,PIK3CA,PIK3CB,PIK3R1,PTPN11,RPL5,SOS1,TGFBR2,RPSA | ND |
| R-HSA-2454202 | Fc epsilon receptor (FCERI) signaling                            | 2.39E-05 | AKAP9,BRAF,CUL1,EGFR, FN1,KRAS,NF1,PIK3CA,PIK3CB,PIK3R1,PTEN,PTPN11,SOS1,SPTAN1                                      | ND |
| R-HSA-1643713 | Signaling by EGFR in Cancer                                      | 2.39E-05 | EGFR,KRAS,PIK3CA,PIK3R1,SOS1                                                                                         | ND |
| R-HSA-5637815 | Signaling by Ligand-Responsive EGFR Variants in Cancer           | 2.39E-05 | EGFR,KRAS,PIK3CA,PIK3R1,SOS1                                                                                         | ND |
| R-HSA-5654687 | Downstream signaling of activated FGFR1                          | 2.97E-05 | AKAP9,BRAF,EGFR, FN1,KRAS,NF1,PIK3CA,PIK3CB,PIK3R1,PTEN,PTPN11,SOS1,SPTAN1                                           | ND |
| R-HSA-5654696 | Downstream signaling of activated FGFR2                          | 2.97E-05 | AKAP9,BRAF,EGFR, FN1,KRAS,NF1,PIK3CA,PIK3CB,PIK3R1,PTEN,PTPN11,SOS1,SPTAN1                                           | ND |
| R-HSA-5654708 | Downstream signaling of activated FGFR3                          | 2.97E-05 | AKAP9,BRAF,EGFR, FN1,KRAS,NF1,PIK3CA,PIK3CB,PIK3R1,PTEN,PTPN11,SOS1,SPTAN1                                           | ND |
| R-HSA-5654716 | Downstream signaling of activated FGFR4                          | 2.97E-05 | AKAP9,BRAF,EGFR, FN1,KRAS,NF1,PIK3CA,PIK3CB,PIK3R1,PTEN,PTPN11,SOS1,SPTAN1                                           | ND |
| R-HSA-512988  | Interleukin-3, 5 and GM-CSF signaling                            | 2.97E-05 | AKAP9,BRAF,EGFR, FN1,KRAS,NF1,PIK3CA,PIK3CB,PIK3R1,PTPN11,SOS1,SPTAN1                                                | ND |
| R-HSA-5654736 | Signaling by FGFR1                                               | 2.97E-05 | AKAP9,BRAF,EGFR, FN1,KRAS,NF1,PIK3CA,PIK3CB,PIK3R1,PTEN,PTPN11,SOS1,SPTAN1                                           | ND |

|               |                                |          |                                                                           |             |
|---------------|--------------------------------|----------|---------------------------------------------------------------------------|-------------|
| R-HSA-5654741 | Signaling by FGFR3             | 2.97E-05 | AKAP9,BRAF,EGFR,FN1,KRAS,NF1,PIK3CA,PIK3CB,PIK3R1,PTEN,PTPN11,SOS1,SPTAN1 | ND          |
| R-HSA-5654743 | Signaling by FGFR4             | 2.97E-05 | AKAP9,BRAF,EGFR,FN1,KRAS,NF1,PIK3CA,PIK3CB,PIK3R1,PTEN,PTPN11,SOS1,SPTAN1 | ND          |
| R-HSA-1433557 | Signaling by SCF-KIT           | 2.97E-05 | AKAP9,BRAF,EGFR,FN1,KRAS,NF1,PIK3CA,PIK3CB,PIK3R1,PTEN,PTPN11,SOS1,SPTAN1 | ND          |
| R-HSA-4420097 | VEGFA-VEGFR2 Pathway           | 2.97E-05 | AKAP9,BRAF,EGFR,FN1,KDR,KRAS,NCF2,NF1,PIK3CA,PIK3CB,PIK3R1,SOS1,SPTAN1    | ND          |
| R-HSA-190236  | Signaling by FGFR              | 3.07E-05 | AKAP9,BRAF,EGFR,FN1,KRAS,NF1,PIK3CA,PIK3CB,PIK3R1,PTEN,PTPN11,SOS1,SPTAN1 | ND          |
| R-HSA-5654738 | Signaling by FGFR2             | 3.07E-05 | AKAP9,BRAF,EGFR,FN1,KRAS,NF1,PIK3CA,PIK3CB,PIK3R1,PTEN,PTPN11,SOS1,SPTAN1 | ND          |
| R-HSA-1227986 | Signaling by ERBB2             | 3.18E-05 | AKAP9,BRAF,EGFR,FN1,KRAS,NF1,PIK3CA,PIK3CB,PIK3R1,PTEN,PTPN11,SOS1,SPTAN1 | ND          |
| R-HSA-194138  | Signaling by VEGF              | 3.18E-05 | AKAP9,BRAF,EGFR,FN1,KDR,KRAS,NCF2,NF1,PIK3CA,PIK3CB,PIK3R1,SOS1,SPTAN1    | ND          |
| R-HSA-186763  | Downstream signal transduction | 3.30E-05 | AKAP9,BRAF,EGFR,FN1,KRAS,NF1,PIK3CA,PIK3CB,PIK3R1,PTEN,PTPN11,SOS1,SPTAN1 | 0.000443176 |

## Supplementary References

- 1 Creixell, P. *et al.* Pathway and network analysis of cancer genomes. *Nat Methods* **12**, 615-621 (2015).
- 2 Khatri, P., Sirota, M. & Butte, A. J. Ten years of pathway analysis: current approaches and outstanding challenges. *PLoS Computational Biology* **8**, e1002375 (2012).
- 3 Huang da, W., Sherman, B. T. & Lempicki, R. A. Bioinformatics enrichment tools: paths toward the comprehensive functional analysis of large gene lists. *Nucleic Acids Research* **37**, 1-13 (2009).
- 4 Ashburner, M. *et al.* Gene ontology: tool for the unification of biology. The Gene Ontology Consortium. *Nature Genetics* **25**, 25-29 (2000).
- 5 Huntley, R. P. *et al.* The GOA database: gene Ontology annotation updates for 2015. *Nucleic Acids Research* **43**, D1057-1063 (2015).
- 6 Croft, D. *et al.* The Reactome pathway knowledgebase. *Nucleic Acids Research* **42**, D472-477 (2014).
- 7 Pruitt, K. D. *et al.* The consensus coding sequence (CCDS) project: Identifying a common protein-coding gene set for the human and mouse genomes. *Genome Research* **19**, 1316-1323 (2009).
- 8 Marcotte, R. *et al.* Functional Genomic Landscape of Human Breast Cancer Drivers, Vulnerabilities, and Resistance. *Cell* **164**, 293-309 (2016).
- 9 Tamborero, D. *et al.* Comprehensive identification of mutational cancer driver genes across 12 tumor types. *Scientific Reports* **3**, 2650 (2013).
- 10 Rubio-Perez, C. *et al.* In silico prescription of anticancer drugs to cohorts of 28 tumor types reveals targeting opportunities. *Cancer Cell* **27**, 382-396 (2015).
- 11 Gonzalez-Perez, A. *et al.* IntOGen-mutations identifies cancer drivers across tumor types. *Nat Methods* **10**, 1081-1082 (2013).
- 12 Merico, D., Isserlin, R., Stueker, O., Emili, A. & Bader, G. D. Enrichment map: a network-based method for gene-set enrichment visualization and interpretation. *PLOS ONE* **5**, e13984 (2010).
- 13 Cline, M. S. *et al.* Integration of biological networks and gene expression data using Cytoscape. *Nature Protocols* **2**, 2366-2382 (2007)
- 14 Hanahan, D. & Weinberg, R. A. Hallmarks of cancer: the next generation. *Cell* **144**, 646-674 (2011).
- 15 Li, A. *et al.* Circadian gene Clock contributes to cell proliferation and migration of glioma and is directly regulated by tumor-suppressive miR-124. *FEBS letters* **587**, 2455-2460 (2013).
- 16 D'Urso, P. I. *et al.* miR-155 is up-regulated in primary and secondary glioblastoma and promotes tumour growth by inhibiting GABA receptors. *International Journal of Oncology* **41**, 228-234 (2012).
- 17 Flavahan, W. A. *et al.* Brain tumor initiating cells adapt to restricted nutrition through preferential glucose uptake. *Nature Neuroscience* **16**, 1373-1382 (2013).
- 18 Takebe, N. *et al.* Targeting Notch, Hedgehog, and Wnt pathways in cancer stem cells: clinical update. *Nature Reviews Clinical Oncology* **12**, 445-464 (2015).
- 19 Seoane, J., Le, H. V., Shen, L., Anderson, S. A. & Massague, J. Integration of Smad and forkhead pathways in the control of neuroepithelial and glioblastoma cell proliferation. *Cell* **117**, 211-223 (2004).
- 20 Brennan, C. W. *et al.* The somatic genomic landscape of glioblastoma. *Cell* **155**, 462-477 (2013).
- 21 Neuzillet, C. *et al.* Targeting the TGFbeta pathway for cancer therapy. *Pharmacology & Therapeutics* **147**, 22-31 (2015).

- 22 Huang, P. H. *et al.* Quantitative analysis of EGFRvIII cellular signaling networks reveals a combinatorial therapeutic strategy for glioblastoma. *Proceedings of the National Academy of Sciences of the United States of America* **104**, 12867-12872 (2007).
- 23 Inda, M. M. *et al.* Tumor heterogeneity is an active process maintained by a mutant EGFR-induced cytokine circuit in glioblastoma. *Genes & Development* **24**, 1731-1745 (2010).
- 24 Shinojima, N. *et al.* Prognostic value of epidermal growth factor receptor in patients with glioblastoma multiforme. *Cancer Research* **63**, 6962-6970 (2003).
- 25 Padfield, E., Ellis, H. P. & Kurian, K. M. Current Therapeutic Advances Targeting EGFR and EGFRvIII in Glioblastoma. *Frontiers in Oncology* **5**, 5 (2015).
- 26 Eden, E., Navon, R., Steinfeld, I., Lipson, D. & Yakhini, Z. GOrrilla: a tool for discovery and visualization of enriched GO terms in ranked gene lists. *BMC Bioinformatics* **10**, 48 (2009).
- 27 Reimand, J., Kull, M., Peterson, H., Hansen, J. & Vilo, J. g:Profiler--a web-based toolset for functional profiling of gene lists from large-scale experiments. *Nucleic Acids Research* **35**, W193-200 (2007).
- 28 Chen, J., Bardes, E. E., Aronow, B. J. & Jegga, A. G. ToppGene Suite for gene list enrichment analysis and candidate gene prioritization. *Nucleic Acids Research* **37**, W305-311 (2009).
- 29 Mi, H., Muruganujan, A. & Thomas, P. D. PANTHER in 2013: modeling the evolution of gene function, and other gene attributes, in the context of phylogenetic trees. *Nucleic Acids Research* **41**, D377-386 (2013).
- 30 Lyne, R. *et al.* Cross-organism analysis using InterMine. *Genesis* **53**, 547-560 (2015).
- 31 Zheng, Q. & Wang, X. J. GOEAST: a web-based software toolkit for Gene Ontology enrichment analysis. *Nucleic Acids Research* **36**, W358-363 (2008).
- 32 Castillo-Davis, C. I. & Hartl, D. L. GeneMerge--post-genomic analysis, data mining, and hypothesis testing. *Bioinformatics* **19**, 891-892 (2003).
- 33 Kamburov, A., Wierling, C., Lehrach, H. & Herwig, R. ConsensusPathDB--a database for integrating human functional interaction networks. *Nucleic acids research* **37**, D623-628 (2009).
- 34 McLean, C. Y. *et al.* GREAT improves functional interpretation of cis-regulatory regions. *Nature Biotechnology* **28**, 495-501 (2010).
- 35 Medina, I. *et al.* Babelomics: an integrative platform for the analysis of transcriptomics, proteomics and genomic data with advanced functional profiling. *Nucleic Acids Research* **38**, W210-213 (2010).
- 36 Kuleshov, M. V. *et al.* Enrichr: a comprehensive gene set enrichment analysis web server 2016 update. *Nucleic Acids Research* (2016).
- 37 Berriz, G. F., King, O. D., Bryant, B., Sander, C. & Roth, F. P. Characterizing gene sets with FuncAssociate. *Bioinformatics* **19**, 2502-2504 (2003).
- 38 Kang, H. *et al.* gsGator: an integrated web platform for cross-species gene set analysis. *BMC bioinformatics* **15**, 13 (2014).
- 39 Zhang, B., Kirov, S. & Snoddy, J. WebGestalt: an integrated system for exploring gene sets in various biological contexts. *Nucleic Acids Research* **33**, W741-748 (2005).
- 40 Carmona-Saez, P., Chagoyen, M., Tirado, F., Carazo, J. M. & Pascual-Montano, A. GENECODIS: a web-based tool for finding significant concurrent annotations in gene lists. *Genome Biology* **8**, R3 (2007).
- 41 Zeeberg, B. R. *et al.* GoMiner: a resource for biological interpretation of genomic and proteomic data. *Genome Biology* **4**, R28 (2003).



- 42 Backes, C. *et al.* GeneTrail--advanced gene set enrichment analysis. *Nucleic Acids Research* **35**, W186-192 (2007).
- 43 Zhou, X. & Su, Z. EasyGO: Gene Ontology-based annotation and functional enrichment analysis tool for agronomical species. *BMC Genomics* **8**, 246 (2007).
- 44 Rho, K. *et al.* GARNET--gene set analysis with exploration of annotation relations. *BMC Bioinformatics* **12 Suppl 1**, S25 (2011).
- 45 Huang da, W., Sherman, B. T. & Lempicki, R. A. Systematic and integrative analysis of large gene lists using DAVID bioinformatics resources. *Nature Protocols* **4**, 44-57 (2009).
- 46 Sartor, M. A. *et al.* ConceptGen: a gene set enrichment and gene set relation mapping tool. *Bioinformatics* **26**, 456-463 (2010).
- 47 Martin, D. *et al.* GOToolBox: functional analysis of gene datasets based on Gene Ontology. *Genome Biology* **5**, R101 (2004).
- 48 Newman, J. C. & Weiner, A. M. L2L: a simple tool for discovering the hidden significance in microarray expression data. *Genome Biology* **6**, R81 (2005).
- 49 Zhong, S. *et al.* GoSurfer: a graphical interactive tool for comparative analysis of large gene sets in Gene Ontology space. *Applied Bioinformatics* **3**, 261-264 (2004).
- 50 Beissbarth, T. & Speed, T. P. Gostat: find statistically overrepresented Gene Ontologies within a group of genes. *Bioinformatics* **20**, 1464-1465 (2004).
